# Supplementary material
Source: publisher figshare collection journal article supplement (https://acs.figshare.com/ndownloader/files/3768925)
Supplement: Supplementary file 1 [file 3768925]

## Sheet: Sheet2
Category	ID	Term	Rank	Count	%	PValue	Genes	List Total	Pop Hits	Pop Total	Fold Enrichment	Bonferroni	Benjamini	FDR
GOTERM_BP_FAT	GO:0006412	translation	1	178	7.79676	5.7182e-70	ENSG00000175390, ENSG00000146282, ENSG00000106305, ENSG00000125445, ENSG00000107581, ENSG00000113643, ENSG00000168827, ENSG00000136628, ENSG00000124614, ENSG00000172172, ENSG00000156482, ENSG00000055950, ENSG00000125844, ENSG00000172239, ENSG00000197756, ENSG00000151247, ENSG00000163682, ENSG00000178952, ENSG00000037241, ENSG00000134419, ENSG00000156508, ENSG00000174748, ENSG00000163584, ENSG0000…	1935	300	12744	3.90772	2.30672e-66	2.30672e-66	1.06361e-66
GOTERM_BP_FAT	GO:0006414	translational elongation	2	77	3.37276	3.63155e-45	ENSG00000131469, ENSG00000161016, ENSG00000168827, ENSG00000071082, ENSG00000148303, ENSG00000124614, ENSG00000171863, ENSG00000063177, ENSG00000156482, ENSG00000125691, ENSG00000171858, ENSG00000197756, ENSG00000163682, ENSG00000108298, ENSG00000178952, ENSG00000037241, ENSG00000134419, ENSG00000156508, ENSG00000174748, ENSG00000089157, ENSG00000122026, ENSG00000083845, ENSG00000198755, ENSG0000…	1935	95	12744	5.33816	1.46497e-41	7.32483e-42	6.75483e-42
GOTERM_BP_FAT	GO:0046907	intracellular transport	3	225	9.85545	2.60177e-37	ENSG00000100075, ENSG00000170759, ENSG00000215305, ENSG00000090889, ENSG00000183684, ENSG00000120805, ENSG00000184743, ENSG00000114503, ENSG00000143553, ENSG00000122958, ENSG00000140464, ENSG00000196497, ENSG00000167996, ENSG00000141458, ENSG00000100280, ENSG00000182934, ENSG00000087088, ENSG00000136986, ENSG00000086065, ENSG00000109519, ENSG00000106367, ENSG00000157020, ENSG00000184432, ENSG0000…	1935	643	12744	2.3046	1.04955e-33	3.49852e-34	4.83941e-34
GOTERM_BP_FAT	GO:0045184	establishment of protein localization	4	243	10.6439	1.63219e-34	ENSG00000215305, ENSG00000143416, ENSG00000086598, ENSG00000143553, ENSG00000109113, ENSG00000116266, ENSG00000099246, ENSG00000131238, ENSG00000122958, ENSG00000140464, ENSG00000167578, ENSG00000196497, ENSG00000143545, ENSG00000166598, ENSG00000100280, ENSG00000182934, ENSG00000136986, ENSG00000086065, ENSG00000109519, ENSG00000111711, ENSG00000106367, ENSG00000157020, ENSG00000184432, ENSG0000…	1935	747	12744	2.14245	6.58427e-31	1.64607e-31	3.03595e-31
GOTERM_BP_FAT	GO:0015031	protein transport	5	241	10.5563	2.60925e-34	ENSG00000215305, ENSG00000143416, ENSG00000086598, ENSG00000143553, ENSG00000109113, ENSG00000116266, ENSG00000099246, ENSG00000131238, ENSG00000122958, ENSG00000140464, ENSG00000167578, ENSG00000196497, ENSG00000143545, ENSG00000166598, ENSG00000100280, ENSG00000182934, ENSG00000136986, ENSG00000086065, ENSG00000109519, ENSG00000111711, ENSG00000106367, ENSG00000157020, ENSG00000184432, ENSG0000…	1935	740	12744	2.14492	1.05257e-30	2.10514e-31	4.85331e-31
GOTERM_BP_FAT	GO:0008104	protein localization	6	261	11.4323	9.68999e-32	ENSG00000215305, ENSG00000143416, ENSG00000086598, ENSG00000143553, ENSG00000109113, ENSG00000116266, ENSG00000099246, ENSG00000131238, ENSG00000122958, ENSG00000140464, ENSG00000167578, ENSG00000196497, ENSG00000143545, ENSG00000166598, ENSG00000100280, ENSG00000142798, ENSG00000182934, ENSG00000087088, ENSG00000136986, ENSG00000086065, ENSG00000110651, ENSG00000111711, ENSG00000109519, ENSG0000…	1935	858	12744	2.00345	3.90894e-28	6.5149e-29	1.80238e-28
GOTERM_BP_FAT	GO:0006091	generation of precursor metabolites and energy	7	119	5.21244	3.92048e-26	ENSG00000115286, ENSG00000010256, ENSG00000146701, ENSG00000116747, ENSG00000023228, ENSG00000158864, ENSG00000149925, ENSG00000159322, ENSG00000114573, ENSG00000117118, ENSG00000178127, ENSG00000164708, ENSG00000062485, ENSG00000182054, ENSG00000109107, ENSG00000100348, ENSG00000130414, ENSG00000122729, ENSG00000091140, ENSG00000120053, ENSG00000119689, ENSG00000111716, ENSG00000173221, ENSG0000…	1935	293	12744	2.67488	1.58152e-22	2.25932e-23	7.29225e-23
GOTERM_BP_FAT	GO:0006457	protein folding	8	81	3.54796	1.01304e-24	ENSG00000109971, ENSG00000141756, ENSG00000179218, ENSG00000120438, ENSG00000163956, ENSG00000113312, ENSG00000120725, ENSG00000136770, ENSG00000126602, ENSG00000183207, ENSG00000103266, ENSG00000116260, ENSG00000122642, ENSG00000100380, ENSG00000088832, ENSG00000162616, ENSG00000136731, ENSG00000023318, ENSG00000163468, ENSG00000146731, ENSG00000143256, ENSG00000164070, ENSG00000143870, ENSG0000…	1935	163	12744	3.27282	4.08662e-21	5.10828e-22	1.88431e-21
GOTERM_BP_FAT	GO:0031145	anaphase-promoting complex-dependent proteasomal ubiquitin-dependent protein catabolic process	9	47	2.05869	2.699e-24	ENSG00000095261, ENSG00000131467, ENSG00000154473, ENSG00000143106, ENSG00000205220, ENSG00000161057, ENSG00000100764, ENSG00000101843, ENSG00000092010, ENSG00000204264, ENSG00000170312, ENSG00000100519, ENSG00000008018, ENSG00000136930, ENSG00000129084, ENSG00000108294, ENSG00000100911, ENSG00000150991, ENSG00000164109, ENSG00000087191, ENSG00000013275, ENSG00000094880, ENSG00000142507, ENSG0000…	1935	64	12744	4.83663	1.08877e-20	1.20975e-21	5.02024e-21
GOTERM_BP_FAT	GO:0051443	positive regulation of ubiquitin-protein ligase activity	10	49	2.1463	2.76347e-24	ENSG00000095261, ENSG00000177889, ENSG00000131467, ENSG00000143106, ENSG00000161057, ENSG00000205220, ENSG00000100764, ENSG00000204264, ENSG00000136930, ENSG00000113558, ENSG00000108294, ENSG00000094880, ENSG00000142507, ENSG00000103035, ENSG00000126067, ENSG00000127445, ENSG00000108671, ENSG00000196510, ENSG00000159377, ENSG00000100804, ENSG00000101182, ENSG00000143947, ENSG00000106588, ENSG0000…	1935	69	12744	4.67705	1.11479e-20	1.11479e-21	5.14018e-21
GOTERM_BP_FAT	GO:0051351	positive regulation of ligase activity	11	50	2.1901	4.30052e-24	ENSG00000095261, ENSG00000177889, ENSG00000131467, ENSG00000143106, ENSG00000161057, ENSG00000205220, ENSG00000100764, ENSG00000204264, ENSG00000136930, ENSG00000113558, ENSG00000108294, ENSG00000094880, ENSG00000142507, ENSG00000103035, ENSG00000126067, ENSG00000127445, ENSG00000108671, ENSG00000196510, ENSG00000159377, ENSG00000100804, ENSG00000101182, ENSG00000143947, ENSG00000106588, ENSG0000…	1935	72	12744	4.57364	1.73483e-20	1.57712e-21	7.99914e-21
GOTERM_BP_FAT	GO:0051439	regulation of ubiquitin-protein ligase activity during mitotic cell cycle	12	49	2.1463	7.48452e-24	ENSG00000095261, ENSG00000131467, ENSG00000143106, ENSG00000161057, ENSG00000205220, ENSG00000100764, ENSG00000204264, ENSG00000136930, ENSG00000113558, ENSG00000108294, ENSG00000164109, ENSG00000094880, ENSG00000142507, ENSG00000103035, ENSG00000126067, ENSG00000108671, ENSG00000196510, ENSG00000159377, ENSG00000100804, ENSG00000101182, ENSG00000143947, ENSG00000106588, ENSG00000100902, ENSG0000…	1935	70	12744	4.61023	3.01926e-20	2.51605e-21	1.39215e-20
GOTERM_BP_FAT	GO:0010498	proteasomal protein catabolic process	13	60	2.62812	1.31861e-23	ENSG00000095261, ENSG00000131467, ENSG00000119318, ENSG00000205220, ENSG00000161057, ENSG00000143106, ENSG00000100764, ENSG00000204264, ENSG00000103266, ENSG00000136930, ENSG00000108294, ENSG00000164109, ENSG00000147475, ENSG00000094880, ENSG00000166598, ENSG00000142507, ENSG00000103035, ENSG00000036257, ENSG00000126067, ENSG00000108671, ENSG00000136986, ENSG00000196510, ENSG00000185104, ENSG0000…	1935	101	12744	3.9125	5.31925e-20	4.09173e-21	2.45266e-20
GOTERM_BP_FAT	GO:0043161	proteasomal ubiquitin-dependent protein catabolic process	14	60	2.62812	1.31861e-23	ENSG00000095261, ENSG00000131467, ENSG00000119318, ENSG00000205220, ENSG00000161057, ENSG00000143106, ENSG00000100764, ENSG00000204264, ENSG00000103266, ENSG00000136930, ENSG00000108294, ENSG00000164109, ENSG00000147475, ENSG00000094880, ENSG00000166598, ENSG00000142507, ENSG00000103035, ENSG00000036257, ENSG00000126067, ENSG00000108671, ENSG00000136986, ENSG00000196510, ENSG00000185104, ENSG0000…	1935	101	12744	3.9125	5.31925e-20	4.09173e-21	2.45266e-20
GOTERM_BP_FAT	GO:0051436	negative regulation of ubiquitin-protein ligase activity during mitotic cell cycle	15	46	2.01489	3.73316e-23	ENSG00000095261, ENSG00000131467, ENSG00000154473, ENSG00000143106, ENSG00000205220, ENSG00000161057, ENSG00000100764, ENSG00000101843, ENSG00000092010, ENSG00000204264, ENSG00000100519, ENSG00000008018, ENSG00000136930, ENSG00000129084, ENSG00000108294, ENSG00000100911, ENSG00000150991, ENSG00000164109, ENSG00000087191, ENSG00000013275, ENSG00000094880, ENSG00000142507, ENSG00000103035, ENSG0000…	1935	64	12744	4.73372	1.50596e-19	1.07568e-20	6.94383e-20
GOTERM_BP_FAT	GO:0051438	regulation of ubiquitin-protein ligase activity	16	51	2.2339	3.78244e-23	ENSG00000095261, ENSG00000177889, ENSG00000131467, ENSG00000143106, ENSG00000161057, ENSG00000205220, ENSG00000100764, ENSG00000204264, ENSG00000136930, ENSG00000113558, ENSG00000108294, ENSG00000164109, ENSG00000094880, ENSG00000142507, ENSG00000103035, ENSG00000126067, ENSG00000127445, ENSG00000108671, ENSG00000196510, ENSG00000159377, ENSG00000100804, ENSG00000101182, ENSG00000143947, ENSG0000…	1935	77	12744	4.36219	1.52584e-19	1.01722e-20	7.03549e-20
GOTERM_BP_FAT	GO:0051340	regulation of ligase activity	17	52	2.2777	4.85354e-23	ENSG00000177889, ENSG00000095261, ENSG00000131467, ENSG00000143106, ENSG00000161057, ENSG00000205220, ENSG00000100764, ENSG00000204264, ENSG00000136930, ENSG00000113558, ENSG00000108294, ENSG00000164109, ENSG00000094880, ENSG00000142507, ENSG00000103035, ENSG00000126067, ENSG00000127445, ENSG00000108671, ENSG00000196510, ENSG00000159377, ENSG00000100804, ENSG00000101182, ENSG00000143947, ENSG0000…	1935	80	12744	4.28093	1.95792e-19	1.2237e-20	9.02779e-20
GOTERM_BP_FAT	GO:0051437	positive regulation of ubiquitin-protein ligase activity during mitotic cell cycle	18	47	2.05869	5.99324e-23	ENSG00000095261, ENSG00000131467, ENSG00000143106, ENSG00000205220, ENSG00000161057, ENSG00000100764, ENSG00000101843, ENSG00000092010, ENSG00000204264, ENSG00000170312, ENSG00000100519, ENSG00000008018, ENSG00000136930, ENSG00000113558, ENSG00000129084, ENSG00000108294, ENSG00000100911, ENSG00000150991, ENSG00000087191, ENSG00000013275, ENSG00000094880, ENSG00000142507, ENSG00000103035, ENSG0000…	1935	67	12744	4.62006	2.41767e-19	1.42216e-20	1.11477e-19
GOTERM_BP_FAT	GO:0051444	negative regulation of ubiquitin-protein ligase activity	19	46	2.01489	2.76162e-22	ENSG00000095261, ENSG00000131467, ENSG00000154473, ENSG00000143106, ENSG00000205220, ENSG00000161057, ENSG00000100764, ENSG00000101843, ENSG00000092010, ENSG00000204264, ENSG00000100519, ENSG00000008018, ENSG00000136930, ENSG00000129084, ENSG00000108294, ENSG00000100911, ENSG00000150991, ENSG00000164109, ENSG00000087191, ENSG00000013275, ENSG00000094880, ENSG00000142507, ENSG00000103035, ENSG0000…	1935	66	12744	4.59027	1.11404e-18	6.18909e-20	5.13672e-19
GOTERM_BP_FAT	GO:0051352	negative regulation of ligase activity	20	46	2.01489	2.76162e-22	ENSG00000095261, ENSG00000131467, ENSG00000154473, ENSG00000143106, ENSG00000205220, ENSG00000161057, ENSG00000100764, ENSG00000101843, ENSG00000092010, ENSG00000204264, ENSG00000100519, ENSG00000008018, ENSG00000136930, ENSG00000129084, ENSG00000108294, ENSG00000100911, ENSG00000150991, ENSG00000164109, ENSG00000087191, ENSG00000013275, ENSG00000094880, ENSG00000142507, ENSG00000103035, ENSG0000…	1935	66	12744	4.59027	1.11404e-18	6.18909e-20	5.13672e-19
GOTERM_BP_FAT	GO:0031398	positive regulation of protein ubiquitination	21	51	2.2339	4.90414e-21	ENSG00000095261, ENSG00000177889, ENSG00000131467, ENSG00000143106, ENSG00000161057, ENSG00000205220, ENSG00000100764, ENSG00000204264, ENSG00000103266, ENSG00000136930, ENSG00000113558, ENSG00000108294, ENSG00000088832, ENSG00000094880, ENSG00000142507, ENSG00000103035, ENSG00000126067, ENSG00000127445, ENSG00000108671, ENSG00000196510, ENSG00000159377, ENSG00000100804, ENSG00000101182, ENSG0000…	1935	83	12744	4.04685	1.97833e-17	1.04123e-18	9.1219e-18
GOTERM_BP_FAT	GO:0016192	vesicle-mediated transport	22	172	7.53395	7.9878e-21	ENSG00000109971, ENSG00000105974, ENSG00000072274, ENSG00000028528, ENSG00000138448, ENSG00000196923, ENSG00000138107, ENSG00000073921, ENSG00000197081, ENSG00000024422, ENSG00000111481, ENSG00000183020, ENSG00000120805, ENSG00000184743, ENSG00000086598, ENSG00000102189, ENSG00000143553, ENSG00000104388, ENSG00000109113, ENSG00000131236, ENSG00000116266, ENSG00000099246, ENSG00000131238, ENSG0000…	1935	566	12744	2.00141	3.22228e-17	1.61114e-18	1.48576e-17
GOTERM_BP_FAT	GO:0006886	intracellular protein transport	23	127	5.56286	9.50737e-21	ENSG00000028528, ENSG00000215305, ENSG00000115306, ENSG00000111481, ENSG00000183020, ENSG00000143553, ENSG00000124783, ENSG00000108953, ENSG00000138750, ENSG00000140464, ENSG00000164144, ENSG00000196497, ENSG00000185359, ENSG00000100280, ENSG00000051128, ENSG00000136986, ENSG00000182934, ENSG00000138768, ENSG00000072958, ENSG00000109519, ENSG00000104980, ENSG00000140319, ENSG00000106367, ENSG0000…	1935	366	12744	2.28532	3.83527e-17	1.82632e-18	1.76841e-17
GOTERM_BP_FAT	GO:0031400	negative regulation of protein modification process	24	62	2.71572	1.22939e-20	ENSG00000095261, ENSG00000131467, ENSG00000105974, ENSG00000205220, ENSG00000161057, ENSG00000143106, ENSG00000100764, ENSG00000160211, ENSG00000204264, ENSG00000108953, ENSG00000136930, ENSG00000108294, ENSG00000088832, ENSG00000164109, ENSG00000094880, ENSG00000142507, ENSG00000103035, ENSG00000106991, ENSG00000126067, ENSG00000119383, ENSG00000108671, ENSG00000087088, ENSG00000135842, ENSG0000…	1935	118	12744	3.46047	4.95937e-17	2.25426e-18	2.28672e-17
GOTERM_BP_FAT	GO:0031397	negative regulation of protein ubiquitination	25	47	2.05869	1.30945e-20	ENSG00000095261, ENSG00000131467, ENSG00000154473, ENSG00000143106, ENSG00000205220, ENSG00000161057, ENSG00000100764, ENSG00000101843, ENSG00000092010, ENSG00000204264, ENSG00000100519, ENSG00000008018, ENSG00000136930, ENSG00000129084, ENSG00000108294, ENSG00000100911, ENSG00000150991, ENSG00000164109, ENSG00000087191, ENSG00000013275, ENSG00000094880, ENSG00000142507, ENSG00000103035, ENSG0000…	1935	73	12744	4.24033	5.28234e-17	2.29667e-18	2.43564e-17
GOTERM_BP_FAT	GO:0006511	ubiquitin-dependent protein catabolic process	26	92	4.02979	2.84526e-20	ENSG00000095261, ENSG00000170242, ENSG00000139842, ENSG00000131467, ENSG00000119318, ENSG00000205220, ENSG00000161057, ENSG00000143106, ENSG00000070010, ENSG00000100764, ENSG00000166233, ENSG00000204264, ENSG00000186591, ENSG00000167986, ENSG00000161011, ENSG00000108094, ENSG00000103266, ENSG00000113558, ENSG00000136930, ENSG00000154582, ENSG00000108294, ENSG00000078140, ENSG00000164109, ENSG0000…	1935	227	12744	2.66923	1.14778e-16	4.78241e-18	5.2923e-17
GOTERM_BP_FAT	GO:0070727	cellular macromolecule localization	27	135	5.91327	3.73582e-20	ENSG00000028528, ENSG00000215305, ENSG00000115306, ENSG00000111481, ENSG00000183020, ENSG00000143553, ENSG00000124214, ENSG00000124783, ENSG00000108953, ENSG00000138750, ENSG00000086827, ENSG00000140464, ENSG00000164144, ENSG00000196497, ENSG00000185359, ENSG00000100280, ENSG00000051128, ENSG00000087088, ENSG00000136986, ENSG00000182934, ENSG00000138768, ENSG00000072958, ENSG00000109519, ENSG0000…	1935	406	12744	2.18994	1.50703e-16	6.02812e-18	6.94878e-17
GOTERM_BP_FAT	GO:0051248	negative regulation of protein metabolic process	28	80	3.50416	4.45314e-20	ENSG00000095261, ENSG00000131467, ENSG00000105974, ENSG00000138448, ENSG00000179218, ENSG00000112210, ENSG00000205220, ENSG00000161057, ENSG00000143106, ENSG00000100764, ENSG00000160211, ENSG00000136770, ENSG00000204264, ENSG00000173039, ENSG00000108953, ENSG00000104408, ENSG00000140464, ENSG00000136930, ENSG00000108294, ENSG00000088832, ENSG00000164109, ENSG00000141543, ENSG00000094880, ENSG0000…	1935	183	12744	2.87915	1.7964e-16	6.90922e-18	8.28303e-17
GOTERM_BP_FAT	GO:0034613	cellular protein localization	29	134	5.86947	5.21745e-20	ENSG00000028528, ENSG00000215305, ENSG00000115306, ENSG00000111481, ENSG00000183020, ENSG00000143553, ENSG00000124783, ENSG00000108953, ENSG00000138750, ENSG00000086827, ENSG00000140464, ENSG00000164144, ENSG00000196497, ENSG00000185359, ENSG00000100280, ENSG00000051128, ENSG00000087088, ENSG00000136986, ENSG00000182934, ENSG00000138768, ENSG00000072958, ENSG00000109519, ENSG00000104980, ENSG0000…	1935	403	12744	2.1899	2.10472e-16	7.79525e-18	9.70467e-17
GOTERM_BP_FAT	GO:0032269	negative regulation of cellular protein metabolic process	30	77	3.37276	2.23737e-19	ENSG00000095261, ENSG00000131467, ENSG00000105974, ENSG00000138448, ENSG00000179218, ENSG00000112210, ENSG00000205220, ENSG00000161057, ENSG00000143106, ENSG00000100764, ENSG00000160211, ENSG00000136770, ENSG00000204264, ENSG00000108953, ENSG00000104408, ENSG00000140464, ENSG00000136930, ENSG00000108294, ENSG00000088832, ENSG00000164109, ENSG00000141543, ENSG00000094880, ENSG00000142507, ENSG0000…	1935	176	12744	2.8814	9.02557e-16	3.22342e-17	4.16161e-16
GOTERM_BP_FAT	GO:0031396	regulation of protein ubiquitination	31	54	2.36531	5.28733e-19	ENSG00000177889, ENSG00000095261, ENSG00000131467, ENSG00000143106, ENSG00000161057, ENSG00000205220, ENSG00000100764, ENSG00000204264, ENSG00000103266, ENSG00000136930, ENSG00000113558, ENSG00000108294, ENSG00000088832, ENSG00000164109, ENSG00000094880, ENSG00000142507, ENSG00000103035, ENSG00000126067, ENSG00000127445, ENSG00000108671, ENSG00000196510, ENSG00000159377, ENSG00000100804, ENSG0000…	1935	99	12744	3.59239	2.13291e-15	7.35486e-17	9.83466e-16
GOTERM_BP_FAT	GO:0048193	Golgi vesicle transport	32	61	2.67192	7.2386e-18	ENSG00000109971, ENSG00000079950, ENSG00000105402, ENSG00000107862, ENSG00000085365, ENSG00000111481, ENSG00000119396, ENSG00000120805, ENSG00000184743, ENSG00000104388, ENSG00000113282, ENSG00000134265, ENSG00000086827, ENSG00000106636, ENSG00000113615, ENSG00000167996, ENSG00000100280, ENSG00000115216, ENSG00000105669, ENSG00000166747, ENSG00000072958, ENSG00000092531, ENSG00000113719, ENSG0000…	1935	127	12744	3.16338	2.92005e-14	9.7335e-16	1.34641e-14
GOTERM_BP_FAT	GO:0000398	nuclear mRNA splicing, via spliceosome	33	67	2.93473	5.49336e-17	ENSG00000079785, ENSG00000161547, ENSG00000125743, ENSG00000071894, ENSG00000183684, ENSG00000198563, ENSG00000099817, ENSG00000114503, ENSG00000163882, ENSG00000177733, ENSG00000144028, ENSG00000060339, ENSG00000168002, ENSG00000124193, ENSG00000125944, ENSG00000136875, ENSG00000136450, ENSG00000100138, ENSG00000136937, ENSG00000128534, ENSG00000165119, ENSG00000135486, ENSG00000126945, ENSG0000…	1935	153	12744	2.88409	2.21602e-13	7.14846e-15	1.02179e-13
GOTERM_BP_FAT	GO:0000375	RNA splicing, via transesterification reactions	34	67	2.93473	5.49336e-17	ENSG00000079785, ENSG00000161547, ENSG00000125743, ENSG00000071894, ENSG00000183684, ENSG00000198563, ENSG00000099817, ENSG00000114503, ENSG00000163882, ENSG00000177733, ENSG00000144028, ENSG00000060339, ENSG00000168002, ENSG00000124193, ENSG00000125944, ENSG00000136875, ENSG00000136450, ENSG00000100138, ENSG00000136937, ENSG00000128534, ENSG00000165119, ENSG00000135486, ENSG00000126945, ENSG0000…	1935	153	12744	2.88409	2.21602e-13	7.14846e-15	1.02179e-13
GOTERM_BP_FAT	GO:0000377	RNA splicing, via transesterification reactions with bulged adenosine as nucleophile	35	67	2.93473	5.49336e-17	ENSG00000079785, ENSG00000161547, ENSG00000125743, ENSG00000071894, ENSG00000183684, ENSG00000198563, ENSG00000099817, ENSG00000114503, ENSG00000163882, ENSG00000177733, ENSG00000144028, ENSG00000060339, ENSG00000168002, ENSG00000124193, ENSG00000125944, ENSG00000136875, ENSG00000136450, ENSG00000100138, ENSG00000136937, ENSG00000128534, ENSG00000165119, ENSG00000135486, ENSG00000126945, ENSG0000…	1935	153	12744	2.88409	2.21602e-13	7.14846e-15	1.02179e-13
GOTERM_BP_FAT	GO:0016044	membrane organization	36	119	5.21244	1.4525e-15	ENSG00000109971, ENSG00000072274, ENSG00000105974, ENSG00000028528, ENSG00000084073, ENSG00000138448, ENSG00000196923, ENSG00000130635, ENSG00000073921, ENSG00000197081, ENSG00000024422, ENSG00000111481, ENSG00000183020, ENSG00000102189, ENSG00000109113, ENSG00000131236, ENSG00000099246, ENSG00000131238, ENSG00000153071, ENSG00000167996, ENSG00000141458, ENSG00000100280, ENSG00000170606, ENSG0000…	1935	379	12744	2.06791	5.82223e-12	1.81966e-13	2.68674e-12
GOTERM_BP_FAT	GO:0055114	oxidation reduction	37	166	7.27113	3.62666e-15	ENSG00000115286, ENSG00000010256, ENSG00000146701, ENSG00000159692, ENSG00000083444, ENSG00000126267, ENSG00000143149, ENSG00000079459, ENSG00000177646, ENSG00000117450, ENSG00000023228, ENSG00000158864, ENSG00000116260, ENSG00000117592, ENSG00000167815, ENSG00000106605, ENSG00000167996, ENSG00000117118, ENSG00000178127, ENSG00000157326, ENSG00000182054, ENSG00000117448, ENSG00000148672, ENSG0000…	1935	606	12744	1.8041	1.47795e-11	4.47864e-13	6.81677e-12
GOTERM_BP_FAT	GO:0008380	RNA splicing	38	94	4.11739	6.06732e-15	ENSG00000120948, ENSG00000079785, ENSG00000204560, ENSG00000161547, ENSG00000071894, ENSG00000125743, ENSG00000183684, ENSG00000175467, ENSG00000198563, ENSG00000099817, ENSG00000114503, ENSG00000163882, ENSG00000177733, ENSG00000144028, ENSG00000168002, ENSG00000124193, ENSG00000060339, ENSG00000125944, ENSG00000136875, ENSG00000136450, ENSG00000021776, ENSG00000070756, ENSG00000100138, ENSG0000…	1935	275	12744	2.25123	2.46325e-11	7.24532e-13	1.13576e-11
GOTERM_BP_FAT	GO:0032268	regulation of cellular protein metabolic process	39	133	5.82567	4.97728e-14	ENSG00000105974, ENSG00000138448, ENSG00000161057, ENSG00000205220, ENSG00000100764, ENSG00000005007, ENSG00000114503, ENSG00000204264, ENSG00000136770, ENSG00000108953, ENSG00000172239, ENSG00000151247, ENSG00000140464, ENSG00000198793, ENSG00000088832, ENSG00000089154, ENSG00000156976, ENSG00000103035, ENSG00000126067, ENSG00000106682, ENSG00000196591, ENSG00000127445, ENSG00000106263, ENSG0000…	1935	462	12744	1.89598	2.00643e-10	5.73264e-12	9.25149e-11
GOTERM_BP_FAT	GO:0016071	mRNA metabolic process	40	111	4.86202	5.6074e-14	ENSG00000120948, ENSG00000138385, ENSG00000125743, ENSG00000183684, ENSG00000099817, ENSG00000005007, ENSG00000114503, ENSG00000163882, ENSG00000144028, ENSG00000168002, ENSG00000124193, ENSG00000172239, ENSG00000111605, ENSG00000125944, ENSG00000136875, ENSG00000021776, ENSG00000100138, ENSG00000066044, ENSG00000165119, ENSG00000170473, ENSG00000047315, ENSG00000096746, ENSG00000138668, ENSG0000…	1935	360	12744	2.0307	2.26171e-10	6.28253e-12	1.04283e-10
GOTERM_BP_FAT	GO:0043933	macromolecular complex subunit organization	41	179	7.84056	5.7735e-14	ENSG00000115286, ENSG00000028839, ENSG00000105974, ENSG00000184640, ENSG00000107581, ENSG00000108064, ENSG00000124610, ENSG00000125743, ENSG00000073921, ENSG00000120438, ENSG00000166333, ENSG00000136628, ENSG00000173801, ENSG00000114503, ENSG00000184743, ENSG00000099817, ENSG00000138758, ENSG00000163882, ENSG00000124193, ENSG00000116266, ENSG00000144028, ENSG00000168002, ENSG00000086827, ENSG0000…	1935	689	12744	1.71103	2.32889e-10	6.2943e-12	1.07381e-10
GOTERM_BP_FAT	GO:0065003	macromolecular complex assembly	42	170	7.44634	6.95461e-14	ENSG00000115286, ENSG00000028839, ENSG00000105974, ENSG00000184640, ENSG00000107581, ENSG00000108064, ENSG00000124610, ENSG00000125743, ENSG00000073921, ENSG00000120438, ENSG00000166333, ENSG00000136628, ENSG00000114503, ENSG00000184743, ENSG00000099817, ENSG00000173801, ENSG00000138758, ENSG00000163882, ENSG00000116266, ENSG00000144028, ENSG00000168002, ENSG00000124193, ENSG00000086827, ENSG0000…	1935	645	12744	1.73586	2.80363e-10	7.37799e-12	1.29274e-10
GOTERM_BP_FAT	GO:0006007	glucose catabolic process	43	34	1.48927	1.31805e-13	ENSG00000105953, ENSG00000111669, ENSG00000142657, ENSG00000146701, ENSG00000168291, ENSG00000116747, ENSG00000067225, ENSG00000160211, ENSG00000067057, ENSG00000134333, ENSG00000111640, ENSG00000102144, ENSG00000014641, ENSG00000149925, ENSG00000159322, ENSG00000150768, ENSG00000105220, ENSG00000131828, ENSG00000079739, ENSG00000152556, ENSG00000130313, ENSG00000049239, ENSG00000164708, ENSG0000…	1935	57	12744	3.92852	5.31615e-10	1.36311e-11	2.45126e-10
GOTERM_BP_FAT	GO:0000278	mitotic cell cycle	44	111	4.86202	1.55641e-13	ENSG00000120948, ENSG00000144744, ENSG00000161057, ENSG00000205220, ENSG00000100764, ENSG00000204264, ENSG00000083642, ENSG00000086827, ENSG00000122545, ENSG00000152253, ENSG00000184445, ENSG00000123374, ENSG00000108055, ENSG00000103035, ENSG00000126067, ENSG00000145349, ENSG00000196510, ENSG00000007168, ENSG00000100804, ENSG00000179051, ENSG00000143947, ENSG00000106588, ENSG00000100902, ENSG0000…	1935	365	12744	2.00288	6.27905e-10	1.56977e-11	2.89524e-10
GOTERM_BP_FAT	GO:0006413	translational initiation	45	29	1.27026	3.42388e-13	ENSG00000175390, ENSG00000184110, ENSG00000104131, ENSG00000107581, ENSG00000100129, ENSG00000130811, ENSG00000089195, ENSG00000147677, ENSG00000135930, ENSG00000172239, ENSG00000151247, ENSG00000104408, ENSG00000100353, ENSG00000083845, ENSG00000205609, ENSG00000084623, ENSG00000139726, ENSG00000119718, ENSG00000106263, ENSG00000130741, ENSG00000100664, ENSG00000111361, ENSG00000115211, ENSG0000…	1935	44	12744	4.3408	1.38121e-09	3.36882e-11	6.36868e-10
GOTERM_BP_FAT	GO:0034621	cellular macromolecular complex subunit organization	46	105	4.59921	3.89992e-13	ENSG00000115286, ENSG00000105974, ENSG00000107581, ENSG00000108064, ENSG00000124610, ENSG00000125743, ENSG00000073921, ENSG00000120438, ENSG00000114503, ENSG00000144028, ENSG00000124193, ENSG00000188229, ENSG00000089159, ENSG00000171953, ENSG00000127824, ENSG00000088832, ENSG00000184357, ENSG00000196497, ENSG00000134046, ENSG00000205531, ENSG00000170606, ENSG00000171530, ENSG00000180370, ENSG0000…	1935	342	12744	2.02203	1.57335e-09	3.74606e-11	7.25453e-10
GOTERM_BP_FAT	GO:0045333	cellular respiration	47	44	1.92729	3.94409e-13	ENSG00000115286, ENSG00000112992, ENSG00000010256, ENSG00000136521, ENSG00000146701, ENSG00000136143, ENSG00000168291, ENSG00000166411, ENSG00000172115, ENSG00000213619, ENSG00000168653, ENSG00000163541, ENSG00000023228, ENSG00000101365, ENSG00000128609, ENSG00000014641, ENSG00000158864, ENSG00000156467, ENSG00000148290, ENSG00000091483, ENSG00000145494, ENSG00000140740, ENSG00000100412, ENSG0000…	1935	91	12744	3.18446	1.59126e-09	3.70061e-11	7.33713e-10
GOTERM_BP_FAT	GO:0006397	mRNA processing	48	98	4.2926	4.58756e-13	ENSG00000120948, ENSG00000125743, ENSG00000183684, ENSG00000099817, ENSG00000114503, ENSG00000163882, ENSG00000124193, ENSG00000168002, ENSG00000144028, ENSG00000111605, ENSG00000125944, ENSG00000136875, ENSG00000021776, ENSG00000100138, ENSG00000165119, ENSG00000047315, ENSG00000096746, ENSG00000138668, ENSG00000121774, ENSG00000065978, ENSG00000147140, ENSG00000099783, ENSG00000179950, ENSG0000…	1935	311	12744	2.07535	1.85057e-09	4.20585e-11	8.53284e-10
GOTERM_BP_FAT	GO:0015980	energy derivation by oxidation of organic compounds	49	56	2.45291	4.84535e-13	ENSG00000115286, ENSG00000010256, ENSG00000136521, ENSG00000146701, ENSG00000168653, ENSG00000163541, ENSG00000023228, ENSG00000101365, ENSG00000128609, ENSG00000014641, ENSG00000158864, ENSG00000145494, ENSG00000004864, ENSG00000178127, ENSG00000117118, ENSG00000112096, ENSG00000062485, ENSG00000182054, ENSG00000198380, ENSG00000172340, ENSG00000099795, ENSG00000100504, ENSG00000213639, ENSG0000…	1935	135	12744	2.73199	1.95448e-09	4.34328e-11	9.0119e-10
GOTERM_BP_FAT	GO:0046365	monosaccharide catabolic process	50	37	1.62067	1.32479e-12	ENSG00000105953, ENSG00000111669, ENSG00000142657, ENSG00000146701, ENSG00000168291, ENSG00000116747, ENSG00000067225, ENSG00000160211, ENSG00000067057, ENSG00000134333, ENSG00000111640, ENSG00000102144, ENSG00000014641, ENSG00000149925, ENSG00000150768, ENSG00000159322, ENSG00000105220, ENSG00000131828, ENSG00000113552, ENSG00000079739, ENSG00000152556, ENSG00000130313, ENSG00000049239, ENSG0000…	1935	70	12744	3.4812	5.34436e-09	1.16182e-10	2.46424e-09
GOTERM_BP_FAT	GO:0043039	tRNA aminoacylation	51	28	1.22646	1.45695e-12	ENSG00000134684, ENSG00000146282, ENSG00000172053, ENSG00000113643, ENSG00000164022, ENSG00000110619, ENSG00000115866, ENSG00000136628, ENSG00000125821, ENSG00000067704, ENSG00000065427, ENSG00000106105, ENSG00000179115, ENSG00000116120, ENSG00000196305, ENSG00000204394, ENSG00000133706, ENSG00000031698, ENSG00000170445, ENSG00000108825, ENSG00000143374, ENSG00000047410, ENSG00000134440, ENSG0000…	1935	43	12744	4.28859	5.87732e-09	1.25049e-10	2.70998e-09
GOTERM_BP_FAT	GO:0006418	tRNA aminoacylation for protein translation	52	28	1.22646	1.45695e-12	ENSG00000134684, ENSG00000146282, ENSG00000172053, ENSG00000113643, ENSG00000164022, ENSG00000110619, ENSG00000115866, ENSG00000136628, ENSG00000125821, ENSG00000067704, ENSG00000065427, ENSG00000106105, ENSG00000179115, ENSG00000116120, ENSG00000196305, ENSG00000204394, ENSG00000133706, ENSG00000031698, ENSG00000170445, ENSG00000108825, ENSG00000143374, ENSG00000047410, ENSG00000134440, ENSG0000…	1935	43	12744	4.28859	5.87732e-09	1.25049e-10	2.70998e-09
GOTERM_BP_FAT	GO:0043038	amino acid activation	53	28	1.22646	1.45695e-12	ENSG00000134684, ENSG00000146282, ENSG00000172053, ENSG00000113643, ENSG00000164022, ENSG00000110619, ENSG00000115866, ENSG00000136628, ENSG00000125821, ENSG00000067704, ENSG00000065427, ENSG00000106105, ENSG00000179115, ENSG00000116120, ENSG00000196305, ENSG00000204394, ENSG00000133706, ENSG00000031698, ENSG00000170445, ENSG00000108825, ENSG00000143374, ENSG00000047410, ENSG00000134440, ENSG0000…	1935	43	12744	4.28859	5.87732e-09	1.25049e-10	2.70998e-09
GOTERM_BP_FAT	GO:0006396	RNA processing	54	142	6.21989	2.77927e-12	ENSG00000091127, ENSG00000120948, ENSG00000138385, ENSG00000125743, ENSG00000100201, ENSG00000183684, ENSG00000114503, ENSG00000099817, ENSG00000163882, ENSG00000144028, ENSG00000168002, ENSG00000124193, ENSG00000111605, ENSG00000125944, ENSG00000136875, ENSG00000021776, ENSG00000100138, ENSG00000165119, ENSG00000087087, ENSG00000047315, ENSG00000075856, ENSG00000096746, ENSG00000138668, ENSG0000…	1935	530	12744	1.76456	1.12114e-08	2.3357e-10	5.16946e-09
GOTERM_BP_FAT	GO:0044275	cellular carbohydrate catabolic process	55	40	1.75208	3.77655e-12	ENSG00000105953, ENSG00000111669, ENSG00000142657, ENSG00000146701, ENSG00000168291, ENSG00000116747, ENSG00000067225, ENSG00000160211, ENSG00000067057, ENSG00000134333, ENSG00000111640, ENSG00000102144, ENSG00000014641, ENSG00000149925, ENSG00000150768, ENSG00000159322, ENSG00000105220, ENSG00000131828, ENSG00000113552, ENSG00000079739, ENSG00000152556, ENSG00000130313, ENSG00000049239, ENSG0000…	1935	82	12744	3.21271	1.52345e-08	3.10909e-10	7.02451e-09
GOTERM_BP_FAT	GO:0034622	cellular macromolecular complex assembly	56	93	4.07359	1.00287e-11	ENSG00000115286, ENSG00000079785, ENSG00000137267, ENSG00000105974, ENSG00000179218, ENSG00000107581, ENSG00000108064, ENSG00000124610, ENSG00000073921, ENSG00000125743, ENSG00000120438, ENSG00000114503, ENSG00000168653, ENSG00000144028, ENSG00000124193, ENSG00000196230, ENSG00000188229, ENSG00000089159, ENSG00000123416, ENSG00000171953, ENSG00000164104, ENSG00000136450, ENSG00000127824, ENSG0000…	1935	303	12744	2.02146	4.0456e-08	8.0912e-10	1.86539e-08
GOTERM_BP_FAT	GO:0019320	hexose catabolic process	57	35	1.53307	1.55594e-11	ENSG00000105953, ENSG00000111669, ENSG00000142657, ENSG00000146701, ENSG00000168291, ENSG00000116747, ENSG00000067225, ENSG00000160211, ENSG00000067057, ENSG00000134333, ENSG00000111640, ENSG00000102144, ENSG00000014641, ENSG00000149925, ENSG00000159322, ENSG00000150768, ENSG00000105220, ENSG00000131828, ENSG00000079739, ENSG00000152556, ENSG00000130313, ENSG00000049239, ENSG00000164708, ENSG0000…	1935	68	12744	3.38988	6.27668e-08	1.23072e-09	2.89412e-08
GOTERM_BP_FAT	GO:0007264	small GTPase mediated signal transduction	58	91	3.98598	2.33133e-11	ENSG00000128340, ENSG00000143862, ENSG00000112210, ENSG00000116473, ENSG00000126934, ENSG00000108061, ENSG00000145907, ENSG00000119396, ENSG00000138757, ENSG00000177885, ENSG00000120805, ENSG00000104388, ENSG00000109113, ENSG00000099246, ENSG00000111540, ENSG00000137962, ENSG00000148484, ENSG00000118508, ENSG00000100030, ENSG00000167578, ENSG00000172757, ENSG00000067900, ENSG00000169228, ENSG0000…	1935	298	12744	2.01118	9.40461e-08	1.80858e-09	4.33638e-08
GOTERM_BP_FAT	GO:0010608	posttranscriptional regulation of gene expression	59	70	3.06614	3.27476e-11	ENSG00000079785, ENSG00000179218, ENSG00000089195, ENSG00000075151, ENSG00000147677, ENSG00000114503, ENSG00000005007, ENSG00000136770, ENSG00000158417, ENSG00000172239, ENSG00000134265, ENSG00000104408, ENSG00000151247, ENSG00000140464, ENSG00000100030, ENSG00000198793, ENSG00000134001, ENSG00000070756, ENSG00000089154, ENSG00000083845, ENSG00000141543, ENSG00000156976, ENSG00000136937, ENSG0000…	1935	206	12744	2.23798	1.32104e-07	2.49252e-09	6.09119e-08
GOTERM_BP_FAT	GO:0046164	alcohol catabolic process	60	38	1.66448	3.80324e-11	ENSG00000105953, ENSG00000111669, ENSG00000142657, ENSG00000146701, ENSG00000168291, ENSG00000116747, ENSG00000067225, ENSG00000160211, ENSG00000067057, ENSG00000134333, ENSG00000111640, ENSG00000102144, ENSG00000014641, ENSG00000149925, ENSG00000150768, ENSG00000159322, ENSG00000105220, ENSG00000131828, ENSG00000113552, ENSG00000079739, ENSG00000152556, ENSG00000130313, ENSG00000049239, ENSG0000…	1935	80	12744	3.12837	1.53423e-07	2.84116e-09	7.07418e-08
GOTERM_BP_FAT	GO:0051187	cofactor catabolic process	61	22	0.963644	5.48284e-11	ENSG00000106605, ENSG00000112992, ENSG00000117118, ENSG00000138413, ENSG00000073578, ENSG00000062485, ENSG00000146701, ENSG00000100292, ENSG00000168291, ENSG00000136143, ENSG00000166411, ENSG00000182054, ENSG00000172340, ENSG00000163541, ENSG00000136010, ENSG00000101365, ENSG00000014641, ENSG00000103415, ENSG00000122729, ENSG00000091483, ENSG00000119689, ENSG00000100412	1935	31	12744	4.67397	2.21178e-07	4.02142e-09	1.01983e-07
GOTERM_BP_FAT	GO:0030029	actin filament-based process	62	76	3.32895	6.33888e-11	ENSG00000100106, ENSG00000128340, ENSG00000106299, ENSG00000196923, ENSG00000139734, ENSG00000179218, ENSG00000122786, ENSG00000024422, ENSG00000050405, ENSG00000198898, ENSG00000073712, ENSG00000131236, ENSG00000198752, ENSG00000134318, ENSG00000136068, ENSG00000149925, ENSG00000172757, ENSG00000017260, ENSG00000067900, ENSG00000117519, ENSG00000070087, ENSG00000133026, ENSG00000092820, ENSG0000…	1935	235	12744	2.12996	2.55711e-07	4.56626e-09	1.17906e-07
GOTERM_BP_FAT	GO:0006096	glycolysis	63	27	1.18265	1.1058e-10	ENSG00000105953, ENSG00000111669, ENSG00000146701, ENSG00000168291, ENSG00000116747, ENSG00000067225, ENSG00000067057, ENSG00000134333, ENSG00000111640, ENSG00000102144, ENSG00000149925, ENSG00000014641, ENSG00000159322, ENSG00000150768, ENSG00000105220, ENSG00000131828, ENSG00000079739, ENSG00000152556, ENSG00000164708, ENSG00000074800, ENSG00000159399, ENSG00000111674, ENSG00000109107, ENSG0000…	1935	46	12744	3.86572	4.46081e-07	7.82599e-09	2.05684e-07
GOTERM_BP_FAT	GO:0006006	glucose metabolic process	64	55	2.40911	1.24512e-10	ENSG00000146701, ENSG00000116747, ENSG00000160211, ENSG00000111640, ENSG00000102144, ENSG00000014641, ENSG00000149925, ENSG00000150768, ENSG00000159322, ENSG00000115159, ENSG00000130313, ENSG00000164708, ENSG00000074800, ENSG00000117448, ENSG00000109107, ENSG00000100504, ENSG00000213639, ENSG00000100994, ENSG00000132356, ENSG00000111716, ENSG00000105953, ENSG00000111669, ENSG00000169764, ENSG0000…	1935	148	12744	2.44752	5.0228e-07	8.66e-09	2.31597e-07
GOTERM_BP_FAT	GO:0070271	protein complex biogenesis	65	130	5.69426	1.28015e-10	ENSG00000115286, ENSG00000028839, ENSG00000105974, ENSG00000184640, ENSG00000108064, ENSG00000073921, ENSG00000120438, ENSG00000166333, ENSG00000136628, ENSG00000184743, ENSG00000099817, ENSG00000173801, ENSG00000138758, ENSG00000163882, ENSG00000116266, ENSG00000168002, ENSG00000086827, ENSG00000140464, ENSG00000077522, ENSG00000089159, ENSG00000188229, ENSG00000122545, ENSG00000171953, ENSG0000…	1935	496	12744	1.72618	5.16412e-07	8.75274e-09	2.38113e-07
GOTERM_BP_FAT	GO:0006461	protein complex assembly	66	130	5.69426	1.28015e-10	ENSG00000115286, ENSG00000028839, ENSG00000105974, ENSG00000184640, ENSG00000108064, ENSG00000073921, ENSG00000120438, ENSG00000166333, ENSG00000136628, ENSG00000184743, ENSG00000099817, ENSG00000173801, ENSG00000138758, ENSG00000163882, ENSG00000116266, ENSG00000168002, ENSG00000086827, ENSG00000140464, ENSG00000077522, ENSG00000089159, ENSG00000188229, ENSG00000122545, ENSG00000171953, ENSG0000…	1935	496	12744	1.72618	5.16412e-07	8.75274e-09	2.38113e-07
GOTERM_BP_FAT	GO:0030036	actin cytoskeleton organization	67	72	3.15375	1.46976e-10	ENSG00000100106, ENSG00000128340, ENSG00000106299, ENSG00000196923, ENSG00000139734, ENSG00000179218, ENSG00000122786, ENSG00000024422, ENSG00000050405, ENSG00000198898, ENSG00000073712, ENSG00000131236, ENSG00000198752, ENSG00000134318, ENSG00000136068, ENSG00000149925, ENSG00000172757, ENSG00000017260, ENSG00000067900, ENSG00000117519, ENSG00000070087, ENSG00000133026, ENSG00000092820, ENSG0000…	1935	221	12744	2.14568	5.92903e-07	9.88172e-09	2.73382e-07
GOTERM_BP_FAT	GO:0009060	aerobic respiration	68	23	1.00745	1.72009e-10	ENSG00000112992, ENSG00000117118, ENSG00000010256, ENSG00000138413, ENSG00000073578, ENSG00000062485, ENSG00000146701, ENSG00000168291, ENSG00000136143, ENSG00000166411, ENSG00000182054, ENSG00000172340, ENSG00000163541, ENSG00000101365, ENSG00000014641, ENSG00000156467, ENSG00000148290, ENSG00000122729, ENSG00000091483, ENSG00000121691, ENSG00000119689, ENSG00000140740, ENSG00000100412	1935	35	12744	4.32797	6.93884e-07	1.13752e-08	3.19944e-07
GOTERM_BP_FAT	GO:0007010	cytoskeleton organization	69	114	4.99343	3.40416e-10	ENSG00000105974, ENSG00000196923, ENSG00000024422, ENSG00000050405, ENSG00000073712, ENSG00000154096, ENSG00000131236, ENSG00000134318, ENSG00000086827, ENSG00000149925, ENSG00000172757, ENSG00000149923, ENSG00000152253, ENSG00000117519, ENSG00000070087, ENSG00000006451, ENSG00000125753, ENSG00000108055, ENSG00000203485, ENSG00000196712, ENSG00000130640, ENSG00000173786, ENSG00000007168, ENSG0000…	1935	423	12744	1.77496	1.37324e-06	2.2149e-08	6.33189e-07
GOTERM_BP_FAT	GO:0031401	positive regulation of protein modification process	70	62	2.71572	3.42046e-10	ENSG00000177889, ENSG00000095261, ENSG00000131467, ENSG00000105974, ENSG00000205220, ENSG00000161057, ENSG00000143106, ENSG00000100764, ENSG00000204264, ENSG00000103266, ENSG00000140464, ENSG00000136930, ENSG00000113558, ENSG00000108294, ENSG00000198793, ENSG00000088832, ENSG00000094880, ENSG00000142507, ENSG00000103035, ENSG00000106991, ENSG00000126067, ENSG00000119383, ENSG00000127445, ENSG0000…	1935	181	12744	2.25599	1.37981e-06	2.19018e-08	6.36219e-07
GOTERM_BP_FAT	GO:0007049	cell cycle	71	178	7.79676	4.06232e-10	ENSG00000120948, ENSG00000184640, ENSG00000144744, ENSG00000071539, ENSG00000161057, ENSG00000197956, ENSG00000205220, ENSG00000166333, ENSG00000100764, ENSG00000005007, ENSG00000138758, ENSG00000204264, ENSG00000178950, ENSG00000083642, ENSG00000086827, ENSG00000140464, ENSG00000159593, ENSG00000126803, ENSG00000122545, ENSG00000152253, ENSG00000184445, ENSG00000123374, ENSG00000108055, ENSG0000…	1935	754	12744	1.5548	1.63874e-06	2.56053e-08	7.55608e-07
GOTERM_BP_FAT	GO:0006099	tricarboxylic acid cycle	72	18	0.788436	4.55299e-10	ENSG00000112992, ENSG00000117118, ENSG00000138413, ENSG00000073578, ENSG00000062485, ENSG00000146701, ENSG00000168291, ENSG00000136143, ENSG00000166411, ENSG00000182054, ENSG00000172340, ENSG00000163541, ENSG00000101365, ENSG00000014641, ENSG00000122729, ENSG00000091483, ENSG00000119689, ENSG00000100412	1935	23	12744	5.1543	1.83667e-06	2.82565e-08	8.46874e-07
GOTERM_BP_FAT	GO:0046356	acetyl-CoA catabolic process	73	18	0.788436	4.55299e-10	ENSG00000112992, ENSG00000117118, ENSG00000138413, ENSG00000073578, ENSG00000062485, ENSG00000146701, ENSG00000168291, ENSG00000136143, ENSG00000166411, ENSG00000182054, ENSG00000172340, ENSG00000163541, ENSG00000101365, ENSG00000014641, ENSG00000122729, ENSG00000091483, ENSG00000119689, ENSG00000100412	1935	23	12744	5.1543	1.83667e-06	2.82565e-08	8.46874e-07
GOTERM_BP_FAT	GO:0022402	cell cycle process	74	140	6.13228	5.19477e-10	ENSG00000120948, ENSG00000071539, ENSG00000161057, ENSG00000205220, ENSG00000166333, ENSG00000100764, ENSG00000204264, ENSG00000083642, ENSG00000086827, ENSG00000140464, ENSG00000126803, ENSG00000122545, ENSG00000152253, ENSG00000184445, ENSG00000123374, ENSG00000108055, ENSG00000103035, ENSG00000126067, ENSG00000145349, ENSG00000196510, ENSG00000007168, ENSG00000100804, ENSG00000179051, ENSG0000…	1935	557	12744	1.65538	2.09557e-06	3.1751e-08	9.66248e-07
GOTERM_BP_FAT	GO:0019318	hexose metabolic process	75	63	2.75953	5.2076e-10	ENSG00000146701, ENSG00000116747, ENSG00000160211, ENSG00000111640, ENSG00000102144, ENSG00000014641, ENSG00000149925, ENSG00000150768, ENSG00000159322, ENSG00000104774, ENSG00000115159, ENSG00000130313, ENSG00000164708, ENSG00000074800, ENSG00000198380, ENSG00000117448, ENSG00000109107, ENSG00000213639, ENSG00000086062, ENSG00000100504, ENSG00000100994, ENSG00000117308, ENSG00000132356, ENSG0000…	1935	187	12744	2.21883	2.10074e-06	3.13544e-08	9.68635e-07
GOTERM_BP_FAT	GO:0006084	acetyl-CoA metabolic process	76	21	0.919842	5.98471e-10	ENSG00000112992, ENSG00000117118, ENSG00000138413, ENSG00000073578, ENSG00000062485, ENSG00000146701, ENSG00000168291, ENSG00000136143, ENSG00000166411, ENSG00000132142, ENSG00000182054, ENSG00000172340, ENSG00000163541, ENSG00000101365, ENSG00000014641, ENSG00000122729, ENSG00000150768, ENSG00000091140, ENSG00000091483, ENSG00000119689, ENSG00000100412	1935	31	12744	4.46152	2.41423e-06	3.55034e-08	1.11318e-06
GOTERM_BP_FAT	GO:0006417	regulation of translation	77	50	2.1901	6.06812e-10	ENSG00000079785, ENSG00000179218, ENSG00000089195, ENSG00000075151, ENSG00000147677, ENSG00000005007, ENSG00000114503, ENSG00000136770, ENSG00000158417, ENSG00000172239, ENSG00000151247, ENSG00000104408, ENSG00000140464, ENSG00000100030, ENSG00000198793, ENSG00000134001, ENSG00000089154, ENSG00000141543, ENSG00000083845, ENSG00000136937, ENSG00000156976, ENSG00000106682, ENSG00000106263, ENSG0000…	1935	133	12744	2.47596	2.44788e-06	3.54765e-08	1.1287e-06
GOTERM_BP_FAT	GO:0016052	carbohydrate catabolic process	78	43	1.88349	7.69184e-10	ENSG00000105953, ENSG00000111669, ENSG00000142657, ENSG00000146701, ENSG00000168291, ENSG00000116747, ENSG00000067225, ENSG00000160211, ENSG00000067057, ENSG00000134333, ENSG00000111640, ENSG00000102144, ENSG00000014641, ENSG00000149925, ENSG00000150768, ENSG00000159322, ENSG00000105220, ENSG00000131828, ENSG00000113552, ENSG00000079739, ENSG00000152556, ENSG00000130313, ENSG00000049239, ENSG0000…	1935	106	12744	2.6717	3.10288e-06	4.4327e-08	1.43071e-06
GOTERM_BP_FAT	GO:0009109	coenzyme catabolic process	79	19	0.832238	7.787e-10	ENSG00000112992, ENSG00000117118, ENSG00000138413, ENSG00000073578, ENSG00000062485, ENSG00000146701, ENSG00000168291, ENSG00000136143, ENSG00000166411, ENSG00000182054, ENSG00000172340, ENSG00000163541, ENSG00000136010, ENSG00000101365, ENSG00000014641, ENSG00000122729, ENSG00000091483, ENSG00000119689, ENSG00000100412	1935	26	12744	4.81288	3.14127e-06	4.42433e-08	1.44841e-06
GOTERM_BP_FAT	GO:0005996	monosaccharide metabolic process	80	69	3.02234	1.18391e-09	ENSG00000146701, ENSG00000116747, ENSG00000160211, ENSG00000111640, ENSG00000102144, ENSG00000014641, ENSG00000149925, ENSG00000159322, ENSG00000150768, ENSG00000104774, ENSG00000113552, ENSG00000115159, ENSG00000130313, ENSG00000164708, ENSG00000165609, ENSG00000074800, ENSG00000198380, ENSG00000117448, ENSG00000124357, ENSG00000109107, ENSG00000213639, ENSG00000100504, ENSG00000086062, ENSG0000…	1935	217	12744	2.09418	4.77587e-06	6.63317e-08	2.20212e-06
GOTERM_BP_FAT	GO:0045454	cell redox homeostasis	81	30	1.31406	2.21313e-09	ENSG00000100823, ENSG00000167693, ENSG00000136810, ENSG00000185624, ENSG00000123131, ENSG00000155660, ENSG00000166479, ENSG00000117450, ENSG00000156709, ENSG00000167004, ENSG00000116260, ENSG00000117592, ENSG00000125827, ENSG00000023318, ENSG00000167815, ENSG00000198431, ENSG00000143870, ENSG00000182512, ENSG00000126432, ENSG00000148334, ENSG00000142669, ENSG00000213593, ENSG00000108010, ENSG0000…	1935	61	12744	3.23904	8.92774e-06	1.22298e-07	4.11652e-06
GOTERM_BP_FAT	GO:0006605	protein targeting	82	67	2.93473	2.25361e-09	ENSG00000105401, ENSG00000179218, ENSG00000115306, ENSG00000186432, ENSG00000125691, ENSG00000124783, ENSG00000108953, ENSG00000138750, ENSG00000140464, ENSG00000100030, ENSG00000138297, ENSG00000132842, ENSG00000196497, ENSG00000116688, ENSG00000137575, ENSG00000051128, ENSG00000108424, ENSG00000047410, ENSG00000182934, ENSG00000127603, ENSG00000153037, ENSG00000132507, ENSG00000109519, ENSG0000…	1935	211	12744	2.0913	9.09103e-06	1.22852e-07	4.19181e-06
GOTERM_BP_FAT	GO:0006403	RNA localization	83	40	1.75208	2.66051e-09	ENSG00000138095, ENSG00000119392, ENSG00000132341, ENSG00000122566, ENSG00000183684, ENSG00000198563, ENSG00000108559, ENSG00000110713, ENSG00000155561, ENSG00000114503, ENSG00000005007, ENSG00000138757, ENSG00000113569, ENSG00000163002, ENSG00000124214, ENSG00000157106, ENSG00000181163, ENSG00000138750, ENSG00000162231, ENSG00000111581, ENSG00000197879, ENSG00000141543, ENSG00000136937, ENSG0000…	1935	98	12744	2.68818	1.07324e-05	1.431e-07	4.94866e-06
GOTERM_BP_FAT	GO:0006986	response to unfolded protein	84	32	1.40166	3.5208e-09	ENSG00000109971, ENSG00000080824, ENSG00000213719, ENSG00000144224, ENSG00000197930, ENSG00000055332, ENSG00000204435, ENSG00000204351, ENSG00000126803, ENSG00000204388, ENSG00000204389, ENSG00000162616, ENSG00000145050, ENSG00000120694, ENSG00000023318, ENSG00000149257, ENSG00000204394, ENSG00000164070, ENSG00000136827, ENSG00000213722, ENSG00000144381, ENSG00000170606, ENSG00000124164, ENSG0000…	1935	69	12744	3.0544	1.42028e-05	1.8688e-07	6.54884e-06
GOTERM_BP_FAT	GO:0050658	RNA transport	85	39	1.70828	3.58016e-09	ENSG00000138095, ENSG00000119392, ENSG00000132341, ENSG00000122566, ENSG00000183684, ENSG00000198563, ENSG00000108559, ENSG00000110713, ENSG00000155561, ENSG00000114503, ENSG00000005007, ENSG00000138757, ENSG00000113569, ENSG00000163002, ENSG00000157106, ENSG00000181163, ENSG00000138750, ENSG00000162231, ENSG00000111581, ENSG00000197879, ENSG00000141543, ENSG00000136937, ENSG00000095319, ENSG0000…	1935	95	12744	2.70375	1.44423e-05	1.87563e-07	6.65925e-06
GOTERM_BP_FAT	GO:0050657	nucleic acid transport	86	39	1.70828	3.58016e-09	ENSG00000138095, ENSG00000119392, ENSG00000132341, ENSG00000122566, ENSG00000183684, ENSG00000198563, ENSG00000108559, ENSG00000110713, ENSG00000155561, ENSG00000114503, ENSG00000005007, ENSG00000138757, ENSG00000113569, ENSG00000163002, ENSG00000157106, ENSG00000181163, ENSG00000138750, ENSG00000162231, ENSG00000111581, ENSG00000197879, ENSG00000141543, ENSG00000136937, ENSG00000095319, ENSG0000…	1935	95	12744	2.70375	1.44423e-05	1.87563e-07	6.65925e-06
GOTERM_BP_FAT	GO:0051236	establishment of RNA localization	87	39	1.70828	3.58016e-09	ENSG00000138095, ENSG00000119392, ENSG00000132341, ENSG00000122566, ENSG00000183684, ENSG00000198563, ENSG00000108559, ENSG00000110713, ENSG00000155561, ENSG00000114503, ENSG00000005007, ENSG00000138757, ENSG00000113569, ENSG00000163002, ENSG00000157106, ENSG00000181163, ENSG00000138750, ENSG00000162231, ENSG00000111581, ENSG00000197879, ENSG00000141543, ENSG00000136937, ENSG00000095319, ENSG0000…	1935	95	12744	2.70375	1.44423e-05	1.87563e-07	6.65925e-06
GOTERM_BP_FAT	GO:0032270	positive regulation of cellular protein metabolic process	88	70	3.06614	3.75653e-09	ENSG00000177889, ENSG00000095261, ENSG00000131467, ENSG00000105974, ENSG00000205220, ENSG00000161057, ENSG00000143106, ENSG00000100764, ENSG00000204264, ENSG00000103266, ENSG00000140464, ENSG00000100030, ENSG00000136930, ENSG00000113558, ENSG00000108294, ENSG00000198793, ENSG00000088832, ENSG00000094880, ENSG00000142507, ENSG00000103035, ENSG00000106991, ENSG00000126067, ENSG00000196591, ENSG0000…	1935	227	12744	2.03094	1.51537e-05	1.9428e-07	6.98731e-06
GOTERM_BP_FAT	GO:0022900	electron transport chain	89	41	1.79588	3.88209e-09	ENSG00000115286, ENSG00000010256, ENSG00000140374, ENSG00000136521, ENSG00000197930, ENSG00000172115, ENSG00000136810, ENSG00000213619, ENSG00000168653, ENSG00000023228, ENSG00000128609, ENSG00000158864, ENSG00000156467, ENSG00000145494, ENSG00000140740, ENSG00000164405, ENSG00000004864, ENSG00000167792, ENSG00000125827, ENSG00000198431, ENSG00000178127, ENSG00000117118, ENSG00000112096, ENSG0000…	1935	103	12744	2.62163	1.56602e-05	1.98232e-07	7.22085e-06
GOTERM_BP_FAT	GO:0006635	fatty acid beta-oxidation	90	19	0.832238	4.81385e-09	ENSG00000104823, ENSG00000072778, ENSG00000171503, ENSG00000087008, ENSG00000133835, ENSG00000167969, ENSG00000164039, ENSG00000117054, ENSG00000127884, ENSG00000161533, ENSG00000060971, ENSG00000138029, ENSG00000084754, ENSG00000168306, ENSG00000095321, ENSG00000101986, ENSG00000104325, ENSG00000110090, ENSG00000157184	1935	28	12744	4.4691	1.94189e-05	2.42739e-07	8.95397e-06
GOTERM_BP_FAT	GO:0015931	nucleobase, nucleoside, nucleotide and nucleic acid transport	91	42	1.83968	1.3846e-08	ENSG00000151729, ENSG00000138095, ENSG00000119392, ENSG00000132341, ENSG00000157593, ENSG00000122566, ENSG00000183684, ENSG00000198563, ENSG00000108559, ENSG00000110713, ENSG00000155561, ENSG00000114503, ENSG00000005007, ENSG00000138757, ENSG00000113569, ENSG00000163002, ENSG00000157106, ENSG00000181163, ENSG00000138750, ENSG00000162231, ENSG00000111581, ENSG00000197879, ENSG00000141543, ENSG0000…	1935	111	12744	2.49202	5.58533e-05	6.89566e-07	2.57542e-05
GOTERM_BP_FAT	GO:0051247	positive regulation of protein metabolic process	92	70	3.06614	2.18762e-08	ENSG00000177889, ENSG00000095261, ENSG00000131467, ENSG00000105974, ENSG00000205220, ENSG00000161057, ENSG00000143106, ENSG00000100764, ENSG00000204264, ENSG00000103266, ENSG00000140464, ENSG00000100030, ENSG00000136930, ENSG00000113558, ENSG00000108294, ENSG00000198793, ENSG00000088832, ENSG00000094880, ENSG00000142507, ENSG00000103035, ENSG00000106991, ENSG00000126067, ENSG00000196591, ENSG0000…	1935	236	12744	1.95349	8.82447e-05	1.0762e-06	4.06907e-05
GOTERM_BP_FAT	GO:0006913	nucleocytoplasmic transport	93	51	2.2339	3.24096e-08	ENSG00000179218, ENSG00000140350, ENSG00000115306, ENSG00000186432, ENSG00000119392, ENSG00000183684, ENSG00000198563, ENSG00000114503, ENSG00000005007, ENSG00000125691, ENSG00000138750, ENSG00000140464, ENSG00000100030, ENSG00000111581, ENSG00000136937, ENSG00000196497, ENSG00000135486, ENSG00000108424, ENSG00000184575, ENSG00000047410, ENSG00000132507, ENSG00000082898, ENSG00000069248, ENSG0000…	1935	152	12744	2.20979	0.000130732	1.57519e-06	6.02833e-05
GOTERM_BP_FAT	GO:0031399	regulation of protein modification process	94	80	3.50416	4.71734e-08	ENSG00000177889, ENSG00000095261, ENSG00000131467, ENSG00000105974, ENSG00000205220, ENSG00000161057, ENSG00000143106, ENSG00000146648, ENSG00000100764, ENSG00000160211, ENSG00000204264, ENSG00000108953, ENSG00000103266, ENSG00000140464, ENSG00000113558, ENSG00000136930, ENSG00000108294, ENSG00000198793, ENSG00000088832, ENSG00000164109, ENSG00000094880, ENSG00000142507, ENSG00000103035, ENSG0000…	1935	288	12744	1.82946	0.000190279	2.26544e-06	8.77444e-05
GOTERM_BP_FAT	GO:0043623	cellular protein complex assembly	95	52	2.2777	4.75744e-08	ENSG00000115286, ENSG00000137267, ENSG00000105974, ENSG00000179218, ENSG00000108064, ENSG00000073921, ENSG00000120438, ENSG00000168653, ENSG00000196230, ENSG00000123416, ENSG00000089159, ENSG00000188229, ENSG00000171953, ENSG00000127824, ENSG00000088832, ENSG00000196497, ENSG00000134046, ENSG00000108424, ENSG00000004478, ENSG00000144381, ENSG00000170606, ENSG00000131504, ENSG00000148180, ENSG0000…	1935	158	12744	2.16756	0.000191897	2.25782e-06	8.84902e-05
GOTERM_BP_FAT	GO:0051169	nuclear transport	96	51	2.2339	5.20884e-08	ENSG00000179218, ENSG00000140350, ENSG00000115306, ENSG00000186432, ENSG00000119392, ENSG00000183684, ENSG00000198563, ENSG00000114503, ENSG00000005007, ENSG00000125691, ENSG00000138750, ENSG00000140464, ENSG00000100030, ENSG00000111581, ENSG00000136937, ENSG00000196497, ENSG00000135486, ENSG00000108424, ENSG00000184575, ENSG00000047410, ENSG00000132507, ENSG00000082898, ENSG00000069248, ENSG0000…	1935	154	12744	2.18109	0.000210102	2.4433e-06	9.68865e-05
GOTERM_BP_FAT	GO:0006892	post-Golgi vesicle-mediated transport	97	27	1.18265	6.78336e-08	ENSG00000109971, ENSG00000079950, ENSG00000105402, ENSG00000140497, ENSG00000103496, ENSG00000107862, ENSG00000085365, ENSG00000119396, ENSG00000092108, ENSG00000113282, ENSG00000170310, ENSG00000122705, ENSG00000167996, ENSG00000220205, ENSG00000100280, ENSG00000123240, ENSG00000166747, ENSG00000124333, ENSG00000072958, ENSG00000092531, ENSG00000182287, ENSG00000116521, ENSG00000070367, ENSG0000…	1935	58	12744	3.06592	0.000273603	3.14529e-06	0.000126173
GOTERM_BP_FAT	GO:0051028	mRNA transport	98	34	1.48927	8.89122e-08	ENSG00000138095, ENSG00000119392, ENSG00000183684, ENSG00000108559, ENSG00000198563, ENSG00000138757, ENSG00000155561, ENSG00000114503, ENSG00000005007, ENSG00000110713, ENSG00000113569, ENSG00000163002, ENSG00000157106, ENSG00000138750, ENSG00000162231, ENSG00000111581, ENSG00000197879, ENSG00000141543, ENSG00000136937, ENSG00000095319, ENSG00000135486, ENSG00000075188, ENSG00000088247, ENSG0000…	1935	85	12744	2.63442	0.000358608	4.07581e-06	0.00016538
GOTERM_BP_FAT	GO:0006119	oxidative phosphorylation	99	35	1.53307	9.06377e-08	ENSG00000115286, ENSG00000010256, ENSG00000136521, ENSG00000167863, ENSG00000213619, ENSG00000159720, ENSG00000168653, ENSG00000152234, ENSG00000147416, ENSG00000116459, ENSG00000023228, ENSG00000128609, ENSG00000158864, ENSG00000047249, ENSG00000156467, ENSG00000095002, ENSG00000110955, ENSG00000145494, ENSG00000140740, ENSG00000128524, ENSG00000167792, ENSG00000114573, ENSG00000178127, ENSG0000…	1935	89	12744	2.59002	0.000365566	4.10822e-06	0.00016859
GOTERM_BP_FAT	GO:0006732	coenzyme metabolic process	100	49	2.1463	9.94732e-08	ENSG00000198805, ENSG00000146701, ENSG00000105835, ENSG00000160211, ENSG00000163541, ENSG00000101365, ENSG00000014641, ENSG00000160209, ENSG00000150768, ENSG00000068120, ENSG00000130313, ENSG00000117118, ENSG00000120254, ENSG00000112096, ENSG00000062485, ENSG00000132142, ENSG00000182054, ENSG00000100714, ENSG00000131473, ENSG00000172340, ENSG00000136010, ENSG00000122729, ENSG00000117305, ENSG0000…	1935	148	12744	2.18052	0.000401195	4.4586e-06	0.000185024
GOTERM_BP_FAT	GO:0044271	nitrogen compound biosynthetic process	101	83	3.63557	1.26811e-07	ENSG00000028839, ENSG00000198805, ENSG00000167325, ENSG00000176890, ENSG00000161542, ENSG00000105835, ENSG00000083444, ENSG00000135069, ENSG00000154027, ENSG00000149925, ENSG00000017260, ENSG00000159899, ENSG00000035687, ENSG00000004864, ENSG00000114573, ENSG00000165704, ENSG00000146733, ENSG00000125166, ENSG00000114491, ENSG00000126088, ENSG00000100714, ENSG00000139428, ENSG00000148672, ENSG0000…	1935	309	12744	1.76907	0.000511426	5.62149e-06	0.000235874
GOTERM_BP_FAT	GO:0019395	fatty acid oxidation	102	21	0.919842	1.42354e-07	ENSG00000104823, ENSG00000072778, ENSG00000171503, ENSG00000087008, ENSG00000133835, ENSG00000167969, ENSG00000164039, ENSG00000117054, ENSG00000161533, ENSG00000127884, ENSG00000060971, ENSG00000138029, ENSG00000131373, ENSG00000084754, ENSG00000168306, ENSG00000095321, ENSG00000101986, ENSG00000104325, ENSG00000132356, ENSG00000110090, ENSG00000157184	1935	39	12744	3.54633	0.000574091	6.24189e-06	0.000264784
GOTERM_BP_FAT	GO:0034440	lipid oxidation	103	21	0.919842	1.42354e-07	ENSG00000104823, ENSG00000072778, ENSG00000171503, ENSG00000087008, ENSG00000133835, ENSG00000167969, ENSG00000164039, ENSG00000117054, ENSG00000161533, ENSG00000127884, ENSG00000060971, ENSG00000138029, ENSG00000131373, ENSG00000084754, ENSG00000168306, ENSG00000095321, ENSG00000101986, ENSG00000104325, ENSG00000132356, ENSG00000110090, ENSG00000157184	1935	39	12744	3.54633	0.000574091	6.24189e-06	0.000264784
GOTERM_BP_FAT	GO:0006446	regulation of translational initiation	104	21	0.919842	1.42354e-07	ENSG00000079785, ENSG00000119718, ENSG00000106682, ENSG00000089195, ENSG00000075151, ENSG00000147677, ENSG00000063046, ENSG00000114503, ENSG00000106211, ENSG00000106263, ENSG00000100664, ENSG00000111361, ENSG00000115211, ENSG00000158417, ENSG00000104408, ENSG00000085760, ENSG00000178982, ENSG00000134001, ENSG00000114867, ENSG00000136937, ENSG00000156976	1935	39	12744	3.54633	0.000574091	6.24189e-06	0.000264784
GOTERM_BP_FAT	GO:0009062	fatty acid catabolic process	105	20	0.87604	1.61516e-07	ENSG00000104823, ENSG00000072778, ENSG00000171503, ENSG00000087008, ENSG00000133835, ENSG00000167969, ENSG00000164039, ENSG00000117054, ENSG00000127884, ENSG00000161533, ENSG00000060971, ENSG00000138029, ENSG00000131373, ENSG00000084754, ENSG00000168306, ENSG00000095321, ENSG00000101986, ENSG00000104325, ENSG00000110090, ENSG00000157184	1935	36	12744	3.65891	0.000651344	7.00595e-06	0.000300426
GOTERM_BP_FAT	GO:0051493	regulation of cytoskeleton organization	106	44	1.92729	1.92303e-07	ENSG00000100106, ENSG00000105974, ENSG00000115306, ENSG00000166333, ENSG00000198898, ENSG00000050405, ENSG00000131711, ENSG00000115091, ENSG00000168036, ENSG00000136950, ENSG00000077549, ENSG00000125868, ENSG00000134318, ENSG00000181163, ENSG00000101367, ENSG00000172757, ENSG00000198793, ENSG00000144635, ENSG00000070182, ENSG00000165527, ENSG00000070087, ENSG00000067560, ENSG00000130429, ENSG0000…	1935	129	12744	2.2464	0.000775449	8.25263e-06	0.000357691
GOTERM_BP_FAT	GO:0033365	protein localization in organelle	107	47	2.05869	2.39447e-07	ENSG00000100883, ENSG00000055044, ENSG00000124207, ENSG00000115306, ENSG00000186432, ENSG00000132341, ENSG00000154174, ENSG00000130204, ENSG00000110711, ENSG00000205339, ENSG00000110713, ENSG00000155561, ENSG00000125691, ENSG00000140464, ENSG00000167004, ENSG00000100030, ENSG00000138297, ENSG00000065150, ENSG00000196497, ENSG00000116688, ENSG00000198700, ENSG00000133704, ENSG00000108424, ENSG0000…	1935	143	12744	2.16464	0.000965462	1.01676e-05	0.00044538
GOTERM_BP_FAT	GO:0008064	regulation of actin polymerization or depolymerization	108	25	1.09505	2.63616e-07	ENSG00000100106, ENSG00000115306, ENSG00000050405, ENSG00000198898, ENSG00000115091, ENSG00000136950, ENSG00000077549, ENSG00000125868, ENSG00000172757, ENSG00000198793, ENSG00000070087, ENSG00000165527, ENSG00000070182, ENSG00000130429, ENSG00000163466, ENSG00000042493, ENSG00000111229, ENSG00000137710, ENSG00000145715, ENSG00000087274, ENSG00000148180, ENSG00000162704, ENSG00000197694, ENSG0000…	1935	54	12744	3.0491	0.00106286	1.10773e-05	0.000490336
GOTERM_BP_FAT	GO:0051186	cofactor metabolic process	109	57	2.49671	2.81937e-07	ENSG00000198805, ENSG00000146701, ENSG00000105835, ENSG00000160211, ENSG00000163541, ENSG00000131238, ENSG00000101365, ENSG00000014641, ENSG00000160209, ENSG00000150768, ENSG00000159228, ENSG00000068120, ENSG00000106605, ENSG00000130313, ENSG00000117118, ENSG00000120254, ENSG00000112096, ENSG00000062485, ENSG00000132142, ENSG00000182054, ENSG00000126088, ENSG00000100714, ENSG00000139428, ENSG0000…	1935	189	12744	1.98627	0.00113669	1.1725e-05	0.000524414
GOTERM_BP_FAT	GO:0009165	nucleotide biosynthetic process	110	54	2.36531	4.04106e-07	ENSG00000028839, ENSG00000198805, ENSG00000167325, ENSG00000176890, ENSG00000161542, ENSG00000105835, ENSG00000154027, ENSG00000149925, ENSG00000017260, ENSG00000159899, ENSG00000035687, ENSG00000004864, ENSG00000114573, ENSG00000165704, ENSG00000114491, ENSG00000100714, ENSG00000163655, ENSG00000162368, ENSG00000178921, ENSG00000105726, ENSG00000168393, ENSG00000070961, ENSG00000163399, ENSG0000…	1935	177	12744	2.0093	0.00162883	1.66342e-05	0.000751651
GOTERM_BP_FAT	GO:0006888	ER to Golgi vesicle-mediated transport	111	21	0.919842	4.08962e-07	ENSG00000113615, ENSG00000079332, ENSG00000054116, ENSG00000150961, ENSG00000074695, ENSG00000101310, ENSG00000115216, ENSG00000184743, ENSG00000176986, ENSG00000124333, ENSG00000104388, ENSG00000139921, ENSG00000138802, ENSG00000165280, ENSG00000113719, ENSG00000086827, ENSG00000106636, ENSG00000138674, ENSG00000157020, ENSG00000108433, ENSG00000100934	1935	41	12744	3.37334	0.00164839	1.6664e-05	0.000760684
GOTERM_BP_FAT	GO:0000059	protein import into nucleus, docking	112	13	0.569426	4.24172e-07	ENSG00000196497, ENSG00000198700, ENSG00000124207, ENSG00000133704, ENSG00000108424, ENSG00000083312, ENSG00000205339, ENSG00000110713, ENSG00000155561, ENSG00000105576, ENSG00000082898, ENSG00000130227, ENSG00000065150	1935	17	12744	5.03639	0.00170965	1.71109e-05	0.000788974
GOTERM_BP_FAT	GO:0030832	regulation of actin filament length	113	25	1.09505	6.0108e-07	ENSG00000100106, ENSG00000115306, ENSG00000050405, ENSG00000198898, ENSG00000115091, ENSG00000136950, ENSG00000077549, ENSG00000125868, ENSG00000172757, ENSG00000198793, ENSG00000070087, ENSG00000165527, ENSG00000070182, ENSG00000130429, ENSG00000163466, ENSG00000042493, ENSG00000111229, ENSG00000137710, ENSG00000145715, ENSG00000087274, ENSG00000148180, ENSG00000162704, ENSG00000197694, ENSG0000…	1935	56	12744	2.9402	0.00242182	2.40072e-05	0.00111803
GOTERM_BP_FAT	GO:0034404	nucleobase, nucleoside and nucleotide biosynthetic process	114	55	2.40911	6.39731e-07	ENSG00000028839, ENSG00000198805, ENSG00000167325, ENSG00000176890, ENSG00000161542, ENSG00000105835, ENSG00000154027, ENSG00000149925, ENSG00000017260, ENSG00000159899, ENSG00000035687, ENSG00000004864, ENSG00000114573, ENSG00000165704, ENSG00000114491, ENSG00000100714, ENSG00000163655, ENSG00000162368, ENSG00000178921, ENSG00000105726, ENSG00000168393, ENSG00000070961, ENSG00000163399, ENSG0000…	1935	184	12744	1.96866	0.00257735	2.53004e-05	0.00118992
GOTERM_BP_FAT	GO:0034654	nucleobase, nucleoside, nucleotide and nucleic acid biosynthetic process	115	55	2.40911	6.39731e-07	ENSG00000028839, ENSG00000198805, ENSG00000167325, ENSG00000176890, ENSG00000161542, ENSG00000105835, ENSG00000154027, ENSG00000149925, ENSG00000017260, ENSG00000159899, ENSG00000035687, ENSG00000004864, ENSG00000114573, ENSG00000165704, ENSG00000114491, ENSG00000100714, ENSG00000163655, ENSG00000162368, ENSG00000178921, ENSG00000105726, ENSG00000168393, ENSG00000070961, ENSG00000163399, ENSG0000…	1935	184	12744	1.96866	0.00257735	2.53004e-05	0.00118992
GOTERM_BP_FAT	GO:0009057	macromolecule catabolic process	116	164	7.18353	1.14631e-06	ENSG00000084073, ENSG00000144744, ENSG00000161057, ENSG00000205220, ENSG00000070010, ENSG00000153827, ENSG00000100764, ENSG00000114503, ENSG00000005007, ENSG00000166233, ENSG00000204264, ENSG00000167986, ENSG00000173039, ENSG00000142230, ENSG00000131238, ENSG00000126261, ENSG00000154582, ENSG00000159593, ENSG00000198793, ENSG00000167770, ENSG00000088832, ENSG00000078140, ENSG00000104774, ENSG0000…	1935	759	12744	1.42307	0.00461356	4.48945e-05	0.00213217
GOTERM_BP_FAT	GO:0044265	cellular macromolecule catabolic process	117	154	6.74551	1.20724e-06	ENSG00000084073, ENSG00000144744, ENSG00000161057, ENSG00000205220, ENSG00000070010, ENSG00000153827, ENSG00000100764, ENSG00000114503, ENSG00000005007, ENSG00000166233, ENSG00000204264, ENSG00000167986, ENSG00000173039, ENSG00000142230, ENSG00000131238, ENSG00000126261, ENSG00000154582, ENSG00000159593, ENSG00000167770, ENSG00000078140, ENSG00000114062, ENSG00000166598, ENSG00000135655, ENSG0000…	1935	704	12744	1.4407	0.00485817	4.68259e-05	0.00224549
GOTERM_BP_FAT	GO:0051789	response to protein stimulus	118	36	1.57687	2.00856e-06	ENSG00000109971, ENSG00000080824, ENSG00000213719, ENSG00000144224, ENSG00000197930, ENSG00000055332, ENSG00000131711, ENSG00000204435, ENSG00000115091, ENSG00000204351, ENSG00000126803, ENSG00000204388, ENSG00000204389, ENSG00000162616, ENSG00000145050, ENSG00000120694, ENSG00000023318, ENSG00000149257, ENSG00000204394, ENSG00000164070, ENSG00000136827, ENSG00000213722, ENSG00000144381, ENSG0000…	1935	104	12744	2.27979	0.0080698	7.71641e-05	0.00373594
GOTERM_BP_FAT	GO:0009259	ribonucleotide metabolic process	119	44	1.92729	2.34626e-06	ENSG00000099331, ENSG00000138363, ENSG00000167863, ENSG00000159720, ENSG00000135318, ENSG00000081923, ENSG00000116459, ENSG00000147416, ENSG00000152234, ENSG00000023228, ENSG00000154027, ENSG00000149925, ENSG00000047249, ENSG00000017260, ENSG00000058668, ENSG00000035687, ENSG00000110955, ENSG00000128524, ENSG00000171793, ENSG00000004864, ENSG00000114573, ENSG00000167283, ENSG00000165609, ENSG0000…	1935	140	12744	2.0699	0.00942019	8.92869e-05	0.00436406
GOTERM_BP_FAT	GO:0010324	membrane invagination	120	60	2.62812	3.70057e-06	ENSG00000105974, ENSG00000072274, ENSG00000196923, ENSG00000138448, ENSG00000028528, ENSG00000073921, ENSG00000197081, ENSG00000024422, ENSG00000085365, ENSG00000183020, ENSG00000102189, ENSG00000103966, ENSG00000062598, ENSG00000109113, ENSG00000113282, ENSG00000131236, ENSG00000110047, ENSG00000099246, ENSG00000131238, ENSG00000145192, ENSG00000132842, ENSG00000153071, ENSG00000141458, ENSG0000…	1935	218	12744	1.81267	0.0148173	0.000139506	0.00688299
GOTERM_BP_FAT	GO:0006897	endocytosis	121	60	2.62812	3.70057e-06	ENSG00000105974, ENSG00000072274, ENSG00000196923, ENSG00000138448, ENSG00000028528, ENSG00000073921, ENSG00000197081, ENSG00000024422, ENSG00000085365, ENSG00000183020, ENSG00000102189, ENSG00000103966, ENSG00000062598, ENSG00000109113, ENSG00000113282, ENSG00000131236, ENSG00000110047, ENSG00000099246, ENSG00000131238, ENSG00000145192, ENSG00000132842, ENSG00000153071, ENSG00000141458, ENSG0000…	1935	218	12744	1.81267	0.0148173	0.000139506	0.00688299
GOTERM_BP_FAT	GO:0022613	ribonucleoprotein complex biogenesis	122	51	2.2339	4.60673e-06	ENSG00000079785, ENSG00000107581, ENSG00000125743, ENSG00000148303, ENSG00000171863, ENSG00000114503, ENSG00000101361, ENSG00000077348, ENSG00000124193, ENSG00000144028, ENSG00000111641, ENSG00000136450, ENSG00000089157, ENSG00000141543, ENSG00000100138, ENSG00000136937, ENSG00000122406, ENSG00000114391, ENSG00000161970, ENSG00000099995, ENSG00000164587, ENSG00000102309, ENSG00000055044, ENSG0000…	1935	176	12744	1.90846	0.018412	0.000172055	0.00856836
GOTERM_BP_FAT	GO:0043254	regulation of protein complex assembly	123	30	1.31406	4.89291e-06	ENSG00000100106, ENSG00000105974, ENSG00000115306, ENSG00000198898, ENSG00000115091, ENSG00000131711, ENSG00000136950, ENSG00000077549, ENSG00000101367, ENSG00000136854, ENSG00000198793, ENSG00000070182, ENSG00000165527, ENSG00000130429, ENSG00000163466, ENSG00000189403, ENSG00000042493, ENSG00000111530, ENSG00000111229, ENSG00000070831, ENSG00000137710, ENSG00000145715, ENSG00000185104, ENSG0000…	1935	82	12744	2.40953	0.0195445	0.000181067	0.00910063
GOTERM_BP_FAT	GO:0022904	respiratory electron transport chain	124	24	1.05125	5.14297e-06	ENSG00000115286, ENSG00000117118, ENSG00000178127, ENSG00000010256, ENSG00000112096, ENSG00000073578, ENSG00000136521, ENSG00000213619, ENSG00000168653, ENSG00000099795, ENSG00000023228, ENSG00000110717, ENSG00000119421, ENSG00000128609, ENSG00000158864, ENSG00000115840, ENSG00000156467, ENSG00000130414, ENSG00000091140, ENSG00000065518, ENSG00000184983, ENSG00000145494, ENSG00000004864, ENSG0000…	1935	58	12744	2.72526	0.0205331	0.00018859	0.00956571
GOTERM_BP_FAT	GO:0030833	regulation of actin filament polymerization	125	21	0.919842	5.91857e-06	ENSG00000100106, ENSG00000130429, ENSG00000163466, ENSG00000042493, ENSG00000115306, ENSG00000111229, ENSG00000137710, ENSG00000198898, ENSG00000115091, ENSG00000136950, ENSG00000145715, ENSG00000077549, ENSG00000087274, ENSG00000148180, ENSG00000162704, ENSG00000197694, ENSG00000198793, ENSG00000116489, ENSG00000070182, ENSG00000165527, ENSG00000136238	1935	47	12744	2.9427	0.0235928	0.000215072	0.0110082
GOTERM_BP_FAT	GO:0030163	protein catabolic process	126	132	5.78187	6.17977e-06	ENSG00000084073, ENSG00000144744, ENSG00000161057, ENSG00000205220, ENSG00000070010, ENSG00000153827, ENSG00000100764, ENSG00000166233, ENSG00000204264, ENSG00000173039, ENSG00000167986, ENSG00000142230, ENSG00000131238, ENSG00000126261, ENSG00000154582, ENSG00000159593, ENSG00000198793, ENSG00000167770, ENSG00000078140, ENSG00000114062, ENSG00000166598, ENSG00000135655, ENSG00000103035, ENSG0000…	1935	601	12744	1.44652	0.0246211	0.000222558	0.011494
GOTERM_BP_FAT	GO:0033043	regulation of organelle organization	127	57	2.49671	6.56667e-06	ENSG00000177889, ENSG00000100106, ENSG00000105974, ENSG00000113384, ENSG00000115306, ENSG00000128731, ENSG00000166333, ENSG00000198898, ENSG00000050405, ENSG00000131711, ENSG00000168036, ENSG00000134318, ENSG00000101367, ENSG00000140464, ENSG00000172757, ENSG00000198793, ENSG00000144635, ENSG00000164109, ENSG00000070182, ENSG00000070087, ENSG00000162614, ENSG00000163466, ENSG00000094880, ENSG0000…	1935	207	12744	1.81355	0.0261423	0.000234398	0.0122136
GOTERM_BP_FAT	GO:0046496	nicotinamide nucleotide metabolic process	128	19	0.832238	6.65279e-06	ENSG00000111669, ENSG00000198805, ENSG00000130313, ENSG00000049239, ENSG00000138413, ENSG00000142657, ENSG00000065833, ENSG00000146701, ENSG00000166411, ENSG00000106049, ENSG00000105835, ENSG00000160211, ENSG00000177156, ENSG00000140632, ENSG00000101365, ENSG00000169738, ENSG00000014641, ENSG00000119689, ENSG00000111716	1935	40	12744	3.12837	0.0264805	0.000235389	0.0123737
GOTERM_BP_FAT	GO:0006769	nicotinamide metabolic process	129	19	0.832238	6.65279e-06	ENSG00000111669, ENSG00000198805, ENSG00000130313, ENSG00000049239, ENSG00000138413, ENSG00000142657, ENSG00000065833, ENSG00000146701, ENSG00000166411, ENSG00000106049, ENSG00000105835, ENSG00000160211, ENSG00000177156, ENSG00000140632, ENSG00000101365, ENSG00000169738, ENSG00000014641, ENSG00000119689, ENSG00000111716	1935	40	12744	3.12837	0.0264805	0.000235389	0.0123737
GOTERM_BP_FAT	GO:0030258	lipid modification	130	26	1.13885	7.34626e-06	ENSG00000104823, ENSG00000078269, ENSG00000087008, ENSG00000133835, ENSG00000117054, ENSG00000167969, ENSG00000157106, ENSG00000131373, ENSG00000101986, ENSG00000104325, ENSG00000110090, ENSG00000145675, ENSG00000072778, ENSG00000171503, ENSG00000164039, ENSG00000127884, ENSG00000211456, ENSG00000161533, ENSG00000060971, ENSG00000138029, ENSG00000084754, ENSG00000168306, ENSG00000095321, ENSG0000…	1935	67	12744	2.55578	0.0292001	0.000257662	0.0136635
GOTERM_BP_FAT	GO:0043086	negative regulation of catalytic activity	131	70	3.06614	7.88018e-06	ENSG00000095261, ENSG00000131467, ENSG00000105974, ENSG00000205220, ENSG00000161057, ENSG00000143106, ENSG00000160213, ENSG00000166333, ENSG00000100764, ENSG00000175793, ENSG00000204264, ENSG00000154096, ENSG00000065135, ENSG00000136930, ENSG00000108294, ENSG00000088832, ENSG00000164109, ENSG00000094880, ENSG00000114353, ENSG00000142507, ENSG00000129515, ENSG00000103035, ENSG00000106991, ENSG0000…	1935	273	12744	1.68873	0.0312888	0.000274004	0.0146565
GOTERM_BP_FAT	GO:0044092	negative regulation of molecular function	132	81	3.54796	8.41057e-06	ENSG00000095261, ENSG00000131467, ENSG00000105974, ENSG00000160014, ENSG00000205220, ENSG00000161057, ENSG00000160213, ENSG00000143106, ENSG00000166333, ENSG00000163956, ENSG00000100764, ENSG00000175793, ENSG00000204264, ENSG00000154096, ENSG00000065135, ENSG00000136930, ENSG00000108294, ENSG00000088832, ENSG00000164109, ENSG00000167815, ENSG00000094880, ENSG00000114353, ENSG00000142507, ENSG0000…	1935	330	12744	1.61658	0.0333593	0.000289944	0.0156429
GOTERM_BP_FAT	GO:0017038	protein import	133	40	1.75208	8.42823e-06	ENSG00000055044, ENSG00000124207, ENSG00000115306, ENSG00000186432, ENSG00000132341, ENSG00000154174, ENSG00000130204, ENSG00000110711, ENSG00000205339, ENSG00000110713, ENSG00000155561, ENSG00000125691, ENSG00000140464, ENSG00000167004, ENSG00000100030, ENSG00000138297, ENSG00000065150, ENSG00000196497, ENSG00000116688, ENSG00000198700, ENSG00000108424, ENSG00000133704, ENSG00000083312, ENSG0000…	1935	128	12744	2.05814	0.0334281	0.000288091	0.0156757
GOTERM_BP_FAT	GO:0006901	vesicle coating	134	11	0.481822	9.13107e-06	ENSG00000095139, ENSG00000181789, ENSG00000107862, ENSG00000129083, ENSG00000042753, ENSG00000073921, ENSG00000122218, ENSG00000111481, ENSG00000105669, ENSG00000127946, ENSG00000184432	1935	15	12744	4.82977	0.0361647	0.000309489	0.0169828
GOTERM_BP_FAT	GO:0044087	regulation of cellular component biogenesis	135	41	1.79588	9.1974e-06	ENSG00000100106, ENSG00000105974, ENSG00000115306, ENSG00000198898, ENSG00000131711, ENSG00000115091, ENSG00000136950, ENSG00000077549, ENSG00000101367, ENSG00000137801, ENSG00000136854, ENSG00000198793, ENSG00000150991, ENSG00000070182, ENSG00000165527, ENSG00000067560, ENSG00000130429, ENSG00000163466, ENSG00000006451, ENSG00000189403, ENSG00000042493, ENSG00000111229, ENSG00000111530, ENSG0000…	1935	133	12744	2.03029	0.0364226	0.000309139	0.0171062
GOTERM_BP_FAT	GO:0051603	proteolysis involved in cellular protein catabolic process	136	127	5.56286	1.0153e-05	ENSG00000084073, ENSG00000144744, ENSG00000161057, ENSG00000205220, ENSG00000070010, ENSG00000153827, ENSG00000100764, ENSG00000166233, ENSG00000204264, ENSG00000173039, ENSG00000167986, ENSG00000142230, ENSG00000126261, ENSG00000154582, ENSG00000159593, ENSG00000167770, ENSG00000078140, ENSG00000114062, ENSG00000166598, ENSG00000135655, ENSG00000103035, ENSG00000126067, ENSG00000136986, ENSG0000…	1935	579	12744	1.44461	0.04013	0.000338434	0.0188833
GOTERM_BP_FAT	GO:0009820	alkaloid metabolic process	137	19	0.832238	1.01854e-05	ENSG00000111669, ENSG00000198805, ENSG00000130313, ENSG00000049239, ENSG00000138413, ENSG00000142657, ENSG00000065833, ENSG00000146701, ENSG00000166411, ENSG00000106049, ENSG00000105835, ENSG00000160211, ENSG00000177156, ENSG00000140632, ENSG00000101365, ENSG00000169738, ENSG00000014641, ENSG00000119689, ENSG00000111716	1935	41	12744	3.05207	0.0402554	0.000336731	0.0189436
GOTERM_BP_FAT	GO:0007030	Golgi organization	138	13	0.569426	1.1099e-05	ENSG00000131018, ENSG00000066455, ENSG00000123240, ENSG00000184743, ENSG00000120805, ENSG00000159692, ENSG00000187240, ENSG00000115806, ENSG00000182446, ENSG00000166685, ENSG00000107651, ENSG00000169032, ENSG00000173230	1935	21	12744	4.07708	0.043786	0.000363946	0.0206425
GOTERM_BP_FAT	GO:0009064	glutamine family amino acid metabolic process	139	21	0.919842	1.26284e-05	ENSG00000143811, ENSG00000059573, ENSG00000104524, ENSG00000125166, ENSG00000159423, ENSG00000137563, ENSG00000213722, ENSG00000130707, ENSG00000198380, ENSG00000092621, ENSG00000183010, ENSG00000148672, ENSG00000103876, ENSG00000070669, ENSG00000163655, ENSG00000178921, ENSG00000084774, ENSG00000171793, ENSG00000120053, ENSG00000115419, ENSG00000023909	1935	49	12744	2.82259	0.0496676	0.00041075	0.0234868
GOTERM_BP_FAT	GO:0044257	cellular protein catabolic process	140	127	5.56286	1.31335e-05	ENSG00000084073, ENSG00000144744, ENSG00000161057, ENSG00000205220, ENSG00000070010, ENSG00000153827, ENSG00000100764, ENSG00000166233, ENSG00000204264, ENSG00000173039, ENSG00000167986, ENSG00000142230, ENSG00000126261, ENSG00000154582, ENSG00000159593, ENSG00000167770, ENSG00000078140, ENSG00000114062, ENSG00000166598, ENSG00000135655, ENSG00000103035, ENSG00000126067, ENSG00000136986, ENSG0000…	1935	582	12744	1.43716	0.0516017	0.000423756	0.024426
GOTERM_BP_FAT	GO:0032271	regulation of protein polymerization	141	24	1.05125	1.38382e-05	ENSG00000100106, ENSG00000130429, ENSG00000105974, ENSG00000163466, ENSG00000042493, ENSG00000115306, ENSG00000111229, ENSG00000137710, ENSG00000198898, ENSG00000115091, ENSG00000131711, ENSG00000136950, ENSG00000145715, ENSG00000077549, ENSG00000087274, ENSG00000148180, ENSG00000162704, ENSG00000101367, ENSG00000197694, ENSG00000198793, ENSG00000116489, ENSG00000070182, ENSG00000165527, ENSG0000…	1935	61	12744	2.59123	0.0542943	0.000442948	0.0257366
GOTERM_BP_FAT	GO:0032956	regulation of actin cytoskeleton organization	142	29	1.27026	1.51827e-05	ENSG00000100106, ENSG00000115306, ENSG00000166333, ENSG00000198898, ENSG00000050405, ENSG00000115091, ENSG00000136950, ENSG00000077549, ENSG00000125868, ENSG00000172757, ENSG00000198793, ENSG00000070182, ENSG00000165527, ENSG00000070087, ENSG00000067560, ENSG00000130429, ENSG00000163466, ENSG00000042493, ENSG00000111229, ENSG00000137710, ENSG00000145715, ENSG00000087274, ENSG00000148180, ENSG0000…	1935	82	12744	2.32921	0.0594095	0.000482147	0.0282367
GOTERM_BP_FAT	GO:0019362	pyridine nucleotide metabolic process	143	19	0.832238	1.531e-05	ENSG00000111669, ENSG00000198805, ENSG00000130313, ENSG00000049239, ENSG00000138413, ENSG00000142657, ENSG00000065833, ENSG00000146701, ENSG00000166411, ENSG00000106049, ENSG00000105835, ENSG00000160211, ENSG00000177156, ENSG00000140632, ENSG00000101365, ENSG00000169738, ENSG00000014641, ENSG00000119689, ENSG00000111716	1935	42	12744	2.9794	0.0598925	0.000482392	0.0284734
GOTERM_BP_FAT	GO:0009150	purine ribonucleotide metabolic process	144	40	1.75208	1.53984e-05	ENSG00000099331, ENSG00000138363, ENSG00000167863, ENSG00000159720, ENSG00000135318, ENSG00000081923, ENSG00000116459, ENSG00000147416, ENSG00000152234, ENSG00000023228, ENSG00000154027, ENSG00000149925, ENSG00000047249, ENSG00000017260, ENSG00000058668, ENSG00000035687, ENSG00000110955, ENSG00000128524, ENSG00000004864, ENSG00000114573, ENSG00000167283, ENSG00000174437, ENSG00000131100, ENSG0000…	1935	131	12744	2.01101	0.0602276	0.000481415	0.0286377
GOTERM_BP_FAT	GO:0030705	cytoskeleton-dependent intracellular transport	145	21	0.919842	1.80667e-05	ENSG00000138095, ENSG00000170759, ENSG00000090889, ENSG00000159251, ENSG00000099331, ENSG00000151914, ENSG00000196586, ENSG00000127603, ENSG00000105357, ENSG00000140983, ENSG00000174996, ENSG00000007168, ENSG00000158195, ENSG00000126214, ENSG00000198836, ENSG00000157483, ENSG00000140416, ENSG00000169032, ENSG00000100345, ENSG00000133026, ENSG00000092841	1935	50	12744	2.76614	0.0702893	0.000560472	0.0335995
GOTERM_BP_FAT	GO:0043632	modification-dependent macromolecule catabolic process	146	121	5.30004	1.88723e-05	ENSG00000084073, ENSG00000144744, ENSG00000161057, ENSG00000205220, ENSG00000070010, ENSG00000153827, ENSG00000100764, ENSG00000166233, ENSG00000204264, ENSG00000167986, ENSG00000142230, ENSG00000126261, ENSG00000154582, ENSG00000159593, ENSG00000167770, ENSG00000078140, ENSG00000114062, ENSG00000166598, ENSG00000135655, ENSG00000103035, ENSG00000126067, ENSG00000136986, ENSG00000196510, ENSG0000…	1935	553	12744	1.44107	0.0733057	0.000580988	0.0350974
GOTERM_BP_FAT	GO:0019941	modification-dependent protein catabolic process	147	121	5.30004	1.88723e-05	ENSG00000084073, ENSG00000144744, ENSG00000161057, ENSG00000205220, ENSG00000070010, ENSG00000153827, ENSG00000100764, ENSG00000166233, ENSG00000204264, ENSG00000167986, ENSG00000142230, ENSG00000126261, ENSG00000154582, ENSG00000159593, ENSG00000167770, ENSG00000078140, ENSG00000114062, ENSG00000166598, ENSG00000135655, ENSG00000103035, ENSG00000126067, ENSG00000136986, ENSG00000196510, ENSG0000…	1935	553	12744	1.44107	0.0733057	0.000580988	0.0350974
GOTERM_BP_FAT	GO:0006979	response to oxidative stress	148	45	1.97109	2.04819e-05	ENSG00000100292, ENSG00000146648, ENSG00000160211, ENSG00000173039, ENSG00000116288, ENSG00000115415, ENSG00000117450, ENSG00000172939, ENSG00000107438, ENSG00000140464, ENSG00000103415, ENSG00000158864, ENSG00000181019, ENSG00000089159, ENSG00000117592, ENSG00000169032, ENSG00000100983, ENSG00000167815, ENSG00000130508, ENSG00000138413, ENSG00000126432, ENSG00000136827, ENSG00000106366, ENSG0000…	1935	156	12744	1.89982	0.0793037	0.000625751	0.0380904
GOTERM_BP_FAT	GO:0006739	NADP metabolic process	149	11	0.481822	2.1027e-05	ENSG00000140632, ENSG00000177156, ENSG00000111669, ENSG00000130313, ENSG00000049239, ENSG00000138413, ENSG00000142657, ENSG00000169738, ENSG00000065833, ENSG00000106049, ENSG00000160211	1935	16	12744	4.52791	0.0813258	0.000637569	0.0391038
GOTERM_BP_FAT	GO:0006900	membrane budding	150	11	0.481822	2.1027e-05	ENSG00000095139, ENSG00000181789, ENSG00000107862, ENSG00000129083, ENSG00000042753, ENSG00000073921, ENSG00000122218, ENSG00000111481, ENSG00000105669, ENSG00000127946, ENSG00000184432	1935	16	12744	4.52791	0.0813258	0.000637569	0.0391038
GOTERM_BP_FAT	GO:0006903	vesicle targeting	151	13	0.569426	2.1045e-05	ENSG00000095139, ENSG00000181789, ENSG00000107862, ENSG00000122218, ENSG00000111481, ENSG00000105669, ENSG00000099940, ENSG00000092531, ENSG00000170348, ENSG00000129083, ENSG00000106636, ENSG00000162236, ENSG00000184432	1935	22	12744	3.89175	0.0813927	0.000633356	0.0391374
GOTERM_BP_FAT	GO:0044093	positive regulation of molecular function	152	124	5.43145	2.33753e-05	ENSG00000105974, ENSG00000105976, ENSG00000161057, ENSG00000205220, ENSG00000166333, ENSG00000100764, ENSG00000204264, ENSG00000154096, ENSG00000173039, ENSG00000115415, ENSG00000131236, ENSG00000140464, ENSG00000088832, ENSG00000120063, ENSG00000167815, ENSG00000114353, ENSG00000099956, ENSG00000103035, ENSG00000126067, ENSG00000127445, ENSG00000196712, ENSG00000087088, ENSG00000196510, ENSG0000…	1935	572	12744	1.42774	0.0899875	0.000698252	0.0434701
GOTERM_BP_FAT	GO:0016054	organic acid catabolic process	153	34	1.48927	2.49341e-05	ENSG00000104823, ENSG00000198130, ENSG00000087008, ENSG00000133835, ENSG00000167969, ENSG00000117054, ENSG00000125821, ENSG00000131373, ENSG00000101986, ENSG00000104325, ENSG00000115419, ENSG00000110090, ENSG00000090857, ENSG00000160200, ENSG00000125166, ENSG00000159423, ENSG00000131844, ENSG00000213722, ENSG00000072778, ENSG00000171503, ENSG00000100714, ENSG00000117448, ENSG00000148672, ENSG0000…	1935	106	12744	2.11251	0.0956921	0.000739325	0.0463683
GOTERM_BP_FAT	GO:0046395	carboxylic acid catabolic process	154	34	1.48927	2.49341e-05	ENSG00000104823, ENSG00000198130, ENSG00000087008, ENSG00000133835, ENSG00000167969, ENSG00000117054, ENSG00000125821, ENSG00000131373, ENSG00000101986, ENSG00000104325, ENSG00000115419, ENSG00000110090, ENSG00000090857, ENSG00000160200, ENSG00000125166, ENSG00000159423, ENSG00000131844, ENSG00000213722, ENSG00000072778, ENSG00000171503, ENSG00000100714, ENSG00000117448, ENSG00000148672, ENSG0000…	1935	106	12744	2.11251	0.0956921	0.000739325	0.0463683
GOTERM_BP_FAT	GO:0043244	regulation of protein complex disassembly	155	21	0.919842	2.55156e-05	ENSG00000100106, ENSG00000042493, ENSG00000115306, ENSG00000137710, ENSG00000050405, ENSG00000198898, ENSG00000005007, ENSG00000131711, ENSG00000120705, ENSG00000077549, ENSG00000087274, ENSG00000148180, ENSG00000125868, ENSG00000132507, ENSG00000047849, ENSG00000197694, ENSG00000172757, ENSG00000116489, ENSG00000126524, ENSG00000166963, ENSG00000070182	1935	51	12744	2.7119	0.0978108	0.000751039	0.0474493
GOTERM_BP_FAT	GO:0034660	ncRNA metabolic process	156	58	2.54052	2.91433e-05	ENSG00000091127, ENSG00000146282, ENSG00000138385, ENSG00000113643, ENSG00000115866, ENSG00000110619, ENSG00000089195, ENSG00000136628, ENSG00000171863, ENSG00000101361, ENSG00000077348, ENSG00000111641, ENSG00000067704, ENSG00000037474, ENSG00000065427, ENSG00000106105, ENSG00000179115, ENSG00000141543, ENSG00000116120, ENSG00000143624, ENSG00000196305, ENSG00000122406, ENSG00000170445, ENSG0000…	1935	222	12744	1.72068	0.110918	0.000851562	0.0541938
GOTERM_BP_FAT	GO:0044242	cellular lipid catabolic process	157	27	1.18265	2.91761e-05	ENSG00000104823, ENSG00000213614, ENSG00000087008, ENSG00000133835, ENSG00000117054, ENSG00000167969, ENSG00000166311, ENSG00000131238, ENSG00000131373, ENSG00000101986, ENSG00000117592, ENSG00000104325, ENSG00000110090, ENSG00000072778, ENSG00000049860, ENSG00000171503, ENSG00000149782, ENSG00000164039, ENSG00000127884, ENSG00000161533, ENSG00000060971, ENSG00000138029, ENSG00000124181, ENSG0000…	1935	76	12744	2.33978	0.111036	0.000846391	0.0542549
GOTERM_BP_FAT	GO:0032970	regulation of actin filament-based process	158	29	1.27026	3.22484e-05	ENSG00000100106, ENSG00000115306, ENSG00000166333, ENSG00000198898, ENSG00000050405, ENSG00000115091, ENSG00000136950, ENSG00000077549, ENSG00000125868, ENSG00000172757, ENSG00000198793, ENSG00000070182, ENSG00000165527, ENSG00000070087, ENSG00000067560, ENSG00000130429, ENSG00000163466, ENSG00000042493, ENSG00000111229, ENSG00000137710, ENSG00000145715, ENSG00000087274, ENSG00000148180, ENSG0000…	1935	85	12744	2.247	0.121986	0.000928798	0.0599664
GOTERM_BP_FAT	GO:0051656	establishment of organelle localization	159	25	1.09505	3.27161e-05	ENSG00000181789, ENSG00000138095, ENSG00000107862, ENSG00000100242, ENSG00000122218, ENSG00000111481, ENSG00000099940, ENSG00000181163, ENSG00000086827, ENSG00000129083, ENSG00000106636, ENSG00000162236, ENSG00000090273, ENSG00000169032, ENSG00000133026, ENSG00000095139, ENSG00000094880, ENSG00000070831, ENSG00000105669, ENSG00000140983, ENSG00000092531, ENSG00000170348, ENSG00000007168, ENSG0000…	1935	68	12744	2.42134	0.123641	0.000935584	0.0608359
GOTERM_BP_FAT	GO:0022618	ribonucleoprotein complex assembly	160	25	1.09505	3.27161e-05	ENSG00000079785, ENSG00000107581, ENSG00000168883, ENSG00000125743, ENSG00000074201, ENSG00000114503, ENSG00000124193, ENSG00000144028, ENSG00000104897, ENSG00000181163, ENSG00000105618, ENSG00000143977, ENSG00000174243, ENSG00000183431, ENSG00000136450, ENSG00000182004, ENSG00000136937, ENSG00000114391, ENSG00000167088, ENSG00000100028, ENSG00000144895, ENSG00000101161, ENSG00000100462, ENSG0000…	1935	68	12744	2.42134	0.123641	0.000935584	0.0608359
GOTERM_BP_FAT	GO:0007265	Ras protein signal transduction	161	33	1.44547	3.44363e-05	ENSG00000177105, ENSG00000126934, ENSG00000108061, ENSG00000099331, ENSG00000197122, ENSG00000145907, ENSG00000177885, ENSG00000138757, ENSG00000116288, ENSG00000166913, ENSG00000137962, ENSG00000141522, ENSG00000148484, ENSG00000100030, ENSG00000172757, ENSG00000164692, ENSG00000067900, ENSG00000120063, ENSG00000169032, ENSG00000067560, ENSG00000136279, ENSG00000006451, ENSG00000126458, ENSG0000…	1935	103	12744	2.11009	0.129701	0.00097782	0.0640335
GOTERM_BP_FAT	GO:0009260	ribonucleotide biosynthetic process	162	36	1.57687	3.69309e-05	ENSG00000138363, ENSG00000167863, ENSG00000159720, ENSG00000081923, ENSG00000116459, ENSG00000147416, ENSG00000152234, ENSG00000154027, ENSG00000149925, ENSG00000047249, ENSG00000017260, ENSG00000058668, ENSG00000035687, ENSG00000110955, ENSG00000128524, ENSG00000171793, ENSG00000004864, ENSG00000114573, ENSG00000167283, ENSG00000174437, ENSG00000131100, ENSG00000114491, ENSG00000128050, ENSG0000…	1935	117	12744	2.02648	0.138416	0.00104129	0.0686708
GOTERM_BP_FAT	GO:0006120	mitochondrial electron transport, NADH to ubiquinone	163	17	0.744634	3.97067e-05	ENSG00000115286, ENSG00000178127, ENSG00000136521, ENSG00000213619, ENSG00000099795, ENSG00000168653, ENSG00000023228, ENSG00000110717, ENSG00000128609, ENSG00000119421, ENSG00000158864, ENSG00000130414, ENSG00000091140, ENSG00000065518, ENSG00000184983, ENSG00000145494, ENSG00000167792	1935	37	12744	3.02602	0.14801	0.00111174	0.0738304
GOTERM_BP_FAT	GO:0051170	nuclear import	164	29	1.27026	4.0979e-05	ENSG00000055044, ENSG00000124207, ENSG00000115306, ENSG00000186432, ENSG00000132341, ENSG00000205339, ENSG00000155561, ENSG00000110713, ENSG00000125691, ENSG00000140464, ENSG00000167004, ENSG00000100030, ENSG00000065150, ENSG00000196497, ENSG00000198700, ENSG00000135486, ENSG00000108424, ENSG00000133704, ENSG00000083312, ENSG00000047410, ENSG00000071553, ENSG00000105576, ENSG00000182481, ENSG0000…	1935	86	12744	2.22088	0.152371	0.00113944	0.0761952
GOTERM_BP_FAT	GO:0051640	organelle localization	165	30	1.31406	4.70015e-05	ENSG00000181789, ENSG00000138095, ENSG00000107862, ENSG00000168172, ENSG00000100242, ENSG00000122218, ENSG00000111481, ENSG00000078269, ENSG00000099940, ENSG00000181163, ENSG00000086827, ENSG00000129083, ENSG00000106636, ENSG00000162236, ENSG00000090273, ENSG00000169032, ENSG00000133026, ENSG00000095139, ENSG00000094880, ENSG00000116688, ENSG00000070831, ENSG00000105669, ENSG00000163631, ENSG0000…	1935	91	12744	2.17122	0.172717	0.00129785	0.0873886
GOTERM_BP_FAT	GO:0006098	pentose-phosphate shunt	166	8	0.350416	4.97929e-05	ENSG00000140632, ENSG00000177156, ENSG00000111669, ENSG00000130313, ENSG00000049239, ENSG00000142657, ENSG00000106049, ENSG00000160211	1935	9	12744	5.85426	0.181981	0.00136553	0.0925762
GOTERM_BP_FAT	GO:0043648	dicarboxylic acid metabolic process	167	16	0.700832	5.20301e-05	ENSG00000117118, ENSG00000125166, ENSG00000073578, ENSG00000062485, ENSG00000065833, ENSG00000146701, ENSG00000166411, ENSG00000163541, ENSG00000101365, ENSG00000014641, ENSG00000173599, ENSG00000082212, ENSG00000091140, ENSG00000091483, ENSG00000119689, ENSG00000120053	1935	34	12744	3.09932	0.189331	0.0014172	0.0967339
GOTERM_BP_FAT	GO:0030834	regulation of actin filament depolymerization	168	14	0.613228	5.36886e-05	ENSG00000100106, ENSG00000115306, ENSG00000042493, ENSG00000050405, ENSG00000198898, ENSG00000137710, ENSG00000077549, ENSG00000087274, ENSG00000148180, ENSG00000125868, ENSG00000197694, ENSG00000172757, ENSG00000116489, ENSG00000070182	1935	27	12744	3.41499	0.194736	0.00145254	0.0998158
GOTERM_BP_FAT	GO:0009141	nucleoside triphosphate metabolic process	169	37	1.62067	5.80715e-05	ENSG00000028839, ENSG00000099331, ENSG00000167863, ENSG00000159720, ENSG00000081923, ENSG00000116459, ENSG00000152234, ENSG00000147416, ENSG00000023228, ENSG00000154027, ENSG00000128951, ENSG00000149925, ENSG00000047249, ENSG00000017260, ENSG00000058668, ENSG00000110955, ENSG00000171793, ENSG00000004864, ENSG00000128524, ENSG00000114573, ENSG00000167283, ENSG00000174437, ENSG00000131100, ENSG0000…	1935	124	12744	1.96519	0.20885	0.00156056	0.10796
GOTERM_BP_FAT	GO:0043603	cellular amide metabolic process	170	21	0.919842	6.69447e-05	ENSG00000111669, ENSG00000198805, ENSG00000130313, ENSG00000049239, ENSG00000138413, ENSG00000142657, ENSG00000065833, ENSG00000146701, ENSG00000166411, ENSG00000106049, ENSG00000105835, ENSG00000130707, ENSG00000160211, ENSG00000177156, ENSG00000140632, ENSG00000101365, ENSG00000169738, ENSG00000014641, ENSG00000091140, ENSG00000119689, ENSG00000111716	1935	54	12744	2.56124	0.236669	0.00178691	0.124447
GOTERM_BP_FAT	GO:0006163	purine nucleotide metabolic process	171	48	2.1025	6.79149e-05	ENSG00000099331, ENSG00000138363, ENSG00000167863, ENSG00000159720, ENSG00000135318, ENSG00000138801, ENSG00000081923, ENSG00000116459, ENSG00000147416, ENSG00000152234, ENSG00000023228, ENSG00000154027, ENSG00000149925, ENSG00000047249, ENSG00000017260, ENSG00000058668, ENSG00000095002, ENSG00000159899, ENSG00000035687, ENSG00000143774, ENSG00000110955, ENSG00000128524, ENSG00000004864, ENSG0000…	1935	178	12744	1.77601	0.239651	0.00180086	0.126249
GOTERM_BP_FAT	GO:0006606	protein import into nucleus	172	28	1.22646	7.17944e-05	ENSG00000055044, ENSG00000124207, ENSG00000115306, ENSG00000186432, ENSG00000132341, ENSG00000205339, ENSG00000155561, ENSG00000110713, ENSG00000125691, ENSG00000140464, ENSG00000167004, ENSG00000100030, ENSG00000065150, ENSG00000196497, ENSG00000198700, ENSG00000108424, ENSG00000133704, ENSG00000083312, ENSG00000047410, ENSG00000071553, ENSG00000105576, ENSG00000182481, ENSG00000171960, ENSG0000…	1935	84	12744	2.19535	0.251459	0.00189121	0.133456
GOTERM_BP_FAT	GO:0048199	vesicle targeting, to, from or within Golgi	173	9	0.394218	7.73507e-05	ENSG00000095139, ENSG00000181789, ENSG00000170348, ENSG00000107862, ENSG00000129083, ENSG00000122218, ENSG00000111481, ENSG00000105669, ENSG00000184432	1935	12	12744	4.93953	0.268051	0.00202421	0.143778
GOTERM_BP_FAT	GO:0008652	cellular amino acid biosynthetic process	174	19	0.832238	9.25948e-05	ENSG00000143811, ENSG00000038274, ENSG00000160200, ENSG00000059573, ENSG00000146733, ENSG00000104524, ENSG00000125166, ENSG00000159423, ENSG00000130707, ENSG00000100714, ENSG00000092621, ENSG00000083444, ENSG00000183010, ENSG00000148672, ENSG00000070669, ENSG00000145293, ENSG00000135069, ENSG00000168906, ENSG00000120053	1935	47	12744	2.66244	0.31171	0.00240706	0.17209
GOTERM_BP_FAT	GO:0046034	ATP metabolic process	175	31	1.35786	0.000122136	ENSG00000099331, ENSG00000167863, ENSG00000159720, ENSG00000081923, ENSG00000152234, ENSG00000147416, ENSG00000116459, ENSG00000023228, ENSG00000154027, ENSG00000149925, ENSG00000047249, ENSG00000017260, ENSG00000058668, ENSG00000110955, ENSG00000004864, ENSG00000128524, ENSG00000114573, ENSG00000167283, ENSG00000174437, ENSG00000131100, ENSG00000106992, ENSG00000165629, ENSG00000131473, ENSG0000…	1935	100	12744	2.04167	0.389041	0.00315351	0.226933
GOTERM_BP_FAT	GO:0016050	vesicle organization	176	20	0.87604	0.000125006	ENSG00000095139, ENSG00000105974, ENSG00000181789, ENSG00000107862, ENSG00000073921, ENSG00000122218, ENSG00000111481, ENSG00000105669, ENSG00000085832, ENSG00000102189, ENSG00000138768, ENSG00000124333, ENSG00000184056, ENSG00000065135, ENSG00000042753, ENSG00000129083, ENSG00000136854, ENSG00000127946, ENSG00000167461, ENSG00000184432	1935	52	12744	2.53309	0.396076	0.00320699	0.232261
GOTERM_BP_FAT	GO:0034637	cellular carbohydrate biosynthetic process	177	24	1.05125	0.00013013	ENSG00000038274, ENSG00000159921, ENSG00000111669, ENSG00000115159, ENSG00000104522, ENSG00000164708, ENSG00000142657, ENSG00000183048, ENSG00000151348, ENSG00000013375, ENSG00000111674, ENSG00000160211, ENSG00000100889, ENSG00000086062, ENSG00000100504, ENSG00000114480, ENSG00000173599, ENSG00000130309, ENSG00000167123, ENSG00000105220, ENSG00000120053, ENSG00000079739, ENSG00000117143, ENSG0000…	1935	69	12744	2.2908	0.408431	0.00331713	0.24177
GOTERM_BP_FAT	GO:0009152	purine ribonucleotide biosynthetic process	178	33	1.44547	0.000140411	ENSG00000138363, ENSG00000167863, ENSG00000159720, ENSG00000081923, ENSG00000147416, ENSG00000152234, ENSG00000116459, ENSG00000154027, ENSG00000149925, ENSG00000047249, ENSG00000017260, ENSG00000058668, ENSG00000035687, ENSG00000110955, ENSG00000004864, ENSG00000128524, ENSG00000114573, ENSG00000167283, ENSG00000174437, ENSG00000131100, ENSG00000128050, ENSG00000011052, ENSG00000165629, ENSG0000…	1935	110	12744	1.97581	0.432468	0.0035563	0.260848
GOTERM_BP_FAT	GO:0048200	Golgi transport vesicle coating	179	8	0.350416	0.000144109	ENSG00000095139, ENSG00000181789, ENSG00000107862, ENSG00000129083, ENSG00000122218, ENSG00000111481, ENSG00000105669, ENSG00000184432	1935	10	12744	5.26884	0.440873	0.00362702	0.267709
GOTERM_BP_FAT	GO:0048205	COPI coating of Golgi vesicle	180	8	0.350416	0.000144109	ENSG00000095139, ENSG00000181789, ENSG00000107862, ENSG00000129083, ENSG00000122218, ENSG00000111481, ENSG00000105669, ENSG00000184432	1935	10	12744	5.26884	0.440873	0.00362702	0.267709
GOTERM_BP_FAT	GO:0048194	Golgi vesicle budding	181	8	0.350416	0.000144109	ENSG00000095139, ENSG00000181789, ENSG00000107862, ENSG00000129083, ENSG00000122218, ENSG00000111481, ENSG00000105669, ENSG00000184432	1935	10	12744	5.26884	0.440873	0.00362702	0.267709
GOTERM_BP_FAT	GO:0051129	negative regulation of cellular component organization	182	39	1.70828	0.000150247	ENSG00000100106, ENSG00000115306, ENSG00000198898, ENSG00000050405, ENSG00000197971, ENSG00000131711, ENSG00000154096, ENSG00000077549, ENSG00000181163, ENSG00000141522, ENSG00000101367, ENSG00000137801, ENSG00000119335, ENSG00000164109, ENSG00000070182, ENSG00000165527, ENSG00000067560, ENSG00000115310, ENSG00000189403, ENSG00000042493, ENSG00000076928, ENSG00000070831, ENSG00000118137, ENSG0000…	1935	139	12744	1.84788	0.454549	0.00375778	0.279097
GOTERM_BP_FAT	GO:0043085	positive regulation of catalytic activity	183	108	4.73062	0.000171453	ENSG00000105974, ENSG00000105976, ENSG00000161057, ENSG00000205220, ENSG00000166333, ENSG00000100764, ENSG00000204264, ENSG00000154096, ENSG00000131236, ENSG00000115415, ENSG00000140464, ENSG00000120063, ENSG00000167815, ENSG00000114353, ENSG00000103035, ENSG00000126067, ENSG00000127445, ENSG00000196712, ENSG00000087088, ENSG00000196510, ENSG00000156052, ENSG00000137831, ENSG00000100804, ENSG0000…	1935	507	12744	1.40294	0.499276	0.00426065	0.318429
GOTERM_BP_FAT	GO:0019748	secondary metabolic process	184	26	1.13885	0.000173365	ENSG00000111669, ENSG00000198805, ENSG00000142657, ENSG00000065833, ENSG00000146701, ENSG00000072042, ENSG00000166411, ENSG00000105835, ENSG00000160211, ENSG00000143320, ENSG00000101365, ENSG00000184254, ENSG00000014641, ENSG00000121064, ENSG00000130313, ENSG00000049239, ENSG00000099977, ENSG00000138413, ENSG00000067064, ENSG00000106049, ENSG00000177156, ENSG00000140632, ENSG00000169738, ENSG0000…	1935	79	12744	2.16756	0.503123	0.00428169	0.321974
GOTERM_BP_FAT	GO:0009199	ribonucleoside triphosphate metabolic process	185	33	1.44547	0.000202772	ENSG00000099331, ENSG00000167863, ENSG00000159720, ENSG00000081923, ENSG00000147416, ENSG00000152234, ENSG00000116459, ENSG00000023228, ENSG00000154027, ENSG00000149925, ENSG00000047249, ENSG00000017260, ENSG00000058668, ENSG00000110955, ENSG00000171793, ENSG00000004864, ENSG00000128524, ENSG00000114573, ENSG00000167283, ENSG00000174437, ENSG00000131100, ENSG00000106992, ENSG00000011052, ENSG0000…	1935	112	12744	1.94053	0.558716	0.00497579	0.376493
GOTERM_BP_FAT	GO:0042775	mitochondrial ATP synthesis coupled electron transport	186	19	0.832238	0.000232375	ENSG00000115286, ENSG00000178127, ENSG00000010256, ENSG00000136521, ENSG00000213619, ENSG00000099795, ENSG00000168653, ENSG00000023228, ENSG00000110717, ENSG00000119421, ENSG00000128609, ENSG00000158864, ENSG00000156467, ENSG00000130414, ENSG00000091140, ENSG00000065518, ENSG00000184983, ENSG00000145494, ENSG00000167792	1935	50	12744	2.5027	0.608398	0.00566577	0.431345
GOTERM_BP_FAT	GO:0042773	ATP synthesis coupled electron transport	187	19	0.832238	0.000232375	ENSG00000115286, ENSG00000178127, ENSG00000010256, ENSG00000136521, ENSG00000213619, ENSG00000099795, ENSG00000168653, ENSG00000023228, ENSG00000110717, ENSG00000119421, ENSG00000128609, ENSG00000158864, ENSG00000156467, ENSG00000130414, ENSG00000091140, ENSG00000065518, ENSG00000184983, ENSG00000145494, ENSG00000167792	1935	50	12744	2.5027	0.608398	0.00566577	0.431345
GOTERM_BP_FAT	GO:0006090	pyruvate metabolic process	188	17	0.744634	0.000241847	ENSG00000111669, ENSG00000115159, ENSG00000164708, ENSG00000168291, ENSG00000183048, ENSG00000111674, ENSG00000100889, ENSG00000134333, ENSG00000172270, ENSG00000141526, ENSG00000173599, ENSG00000150768, ENSG00000091140, ENSG00000105220, ENSG00000131828, ENSG00000079739, ENSG00000111716	1935	42	12744	2.66578	0.623083	0.00586065	0.44889
GOTERM_BP_FAT	GO:0006399	tRNA metabolic process	189	33	1.44547	0.000242397	ENSG00000091127, ENSG00000134684, ENSG00000146282, ENSG00000138385, ENSG00000172053, ENSG00000113643, ENSG00000164022, ENSG00000115866, ENSG00000089195, ENSG00000110619, ENSG00000136628, ENSG00000125821, ENSG00000067704, ENSG00000065427, ENSG00000037474, ENSG00000106105, ENSG00000179115, ENSG00000116120, ENSG00000196305, ENSG00000204394, ENSG00000133706, ENSG00000031698, ENSG00000170445, ENSG0000…	1935	113	12744	1.92336	0.623918	0.00583886	0.449908
GOTERM_BP_FAT	GO:0051168	nuclear export	190	21	0.919842	0.00027213	ENSG00000124571, ENSG00000179218, ENSG00000135486, ENSG00000132341, ENSG00000119392, ENSG00000184575, ENSG00000183684, ENSG00000198563, ENSG00000114503, ENSG00000005007, ENSG00000157106, ENSG00000181163, ENSG00000030066, ENSG00000132507, ENSG00000162231, ENSG00000111581, ENSG00000082898, ENSG00000113013, ENSG00000130227, ENSG00000069248, ENSG00000136937	1935	59	12744	2.34419	0.666437	0.00651395	0.504963
GOTERM_BP_FAT	GO:0007005	mitochondrion organization	191	37	1.62067	0.000273875	ENSG00000115286, ENSG00000080824, ENSG00000151729, ENSG00000108064, ENSG00000087470, ENSG00000168827, ENSG00000154174, ENSG00000130204, ENSG00000110711, ENSG00000078269, ENSG00000175793, ENSG00000105197, ENSG00000214253, ENSG00000168653, ENSG00000198836, ENSG00000138297, ENSG00000006625, ENSG00000112893, ENSG00000116688, ENSG00000106028, ENSG00000112096, ENSG00000097033, ENSG00000128654, ENSG0000…	1935	133	12744	1.83221	0.668777	0.00651692	0.508193
GOTERM_BP_FAT	GO:0022406	membrane docking	192	14	0.613228	0.000304552	ENSG00000092820, ENSG00000103496, ENSG00000131558, ENSG00000049245, ENSG00000136631, ENSG00000147065, ENSG00000092108, ENSG00000116266, ENSG00000184056, ENSG00000136854, ENSG00000070367, ENSG00000106636, ENSG00000067900, ENSG00000167461	1935	31	12744	2.97434	0.707342	0.00720189	0.564964
GOTERM_BP_FAT	GO:0006891	intra-Golgi vesicle-mediated transport	193	10	0.43802	0.00031935	ENSG00000090615, ENSG00000105402, ENSG00000134265, ENSG00000129083, ENSG00000166685, ENSG00000066455, ENSG00000111481, ENSG00000123240, ENSG00000105669, ENSG00000184432	1935	17	12744	3.87415	0.724306	0.00750657	0.592339
GOTERM_BP_FAT	GO:0030835	negative regulation of actin filament depolymerization	194	12	0.525624	0.000350241	ENSG00000100106, ENSG00000077549, ENSG00000087274, ENSG00000148180, ENSG00000042493, ENSG00000115306, ENSG00000197694, ENSG00000116489, ENSG00000137710, ENSG00000198898, ENSG00000050405, ENSG00000070182	1935	24	12744	3.29302	0.756617	0.00818215	0.649459
GOTERM_BP_FAT	GO:0006164	purine nucleotide biosynthetic process	195	38	1.66448	0.00037856	ENSG00000138363, ENSG00000167863, ENSG00000159720, ENSG00000135318, ENSG00000081923, ENSG00000116459, ENSG00000147416, ENSG00000152234, ENSG00000154027, ENSG00000149925, ENSG00000047249, ENSG00000017260, ENSG00000058668, ENSG00000159899, ENSG00000095002, ENSG00000035687, ENSG00000110955, ENSG00000128524, ENSG00000004864, ENSG00000114573, ENSG00000165704, ENSG00000167283, ENSG00000174437, ENSG0000…	1935	140	12744	1.78764	0.782901	0.00879005	0.701797
GOTERM_BP_FAT	GO:0034504	protein localization in nucleus	196	28	1.22646	0.00038708	ENSG00000055044, ENSG00000124207, ENSG00000115306, ENSG00000186432, ENSG00000132341, ENSG00000205339, ENSG00000155561, ENSG00000110713, ENSG00000125691, ENSG00000140464, ENSG00000167004, ENSG00000100030, ENSG00000065150, ENSG00000196497, ENSG00000198700, ENSG00000108424, ENSG00000133704, ENSG00000083312, ENSG00000047410, ENSG00000071553, ENSG00000105576, ENSG00000182481, ENSG00000171960, ENSG0000…	1935	92	12744	2.00445	0.790239	0.00893561	0.717538
GOTERM_BP_FAT	GO:0009205	purine ribonucleoside triphosphate metabolic process	197	32	1.40166	0.000392996	ENSG00000099331, ENSG00000167863, ENSG00000159720, ENSG00000081923, ENSG00000152234, ENSG00000147416, ENSG00000116459, ENSG00000023228, ENSG00000154027, ENSG00000149925, ENSG00000047249, ENSG00000017260, ENSG00000058668, ENSG00000110955, ENSG00000004864, ENSG00000128524, ENSG00000114573, ENSG00000167283, ENSG00000174437, ENSG00000131100, ENSG00000106992, ENSG00000011052, ENSG00000165629, ENSG0000…	1935	111	12744	1.89868	0.795187	0.00901997	0.728466
GOTERM_BP_FAT	GO:0009144	purine nucleoside triphosphate metabolic process	198	33	1.44547	0.000405815	ENSG00000099331, ENSG00000167863, ENSG00000159720, ENSG00000081923, ENSG00000152234, ENSG00000147416, ENSG00000116459, ENSG00000023228, ENSG00000154027, ENSG00000149925, ENSG00000047249, ENSG00000017260, ENSG00000058668, ENSG00000110955, ENSG00000004864, ENSG00000128524, ENSG00000114573, ENSG00000167283, ENSG00000174437, ENSG00000131100, ENSG00000106992, ENSG00000011052, ENSG00000165629, ENSG0000…	1935	116	12744	1.87362	0.805513	0.00926022	0.752144
GOTERM_BP_FAT	GO:0006733	oxidoreduction coenzyme metabolic process	199	19	0.832238	0.00040604	ENSG00000111669, ENSG00000198805, ENSG00000130313, ENSG00000049239, ENSG00000138413, ENSG00000142657, ENSG00000065833, ENSG00000146701, ENSG00000166411, ENSG00000106049, ENSG00000105835, ENSG00000160211, ENSG00000177156, ENSG00000140632, ENSG00000101365, ENSG00000169738, ENSG00000014641, ENSG00000119689, ENSG00000111716	1935	52	12744	2.40644	0.80569	0.00921322	0.752559
GOTERM_BP_FAT	GO:0000245	spliceosome assembly	200	14	0.613228	0.000442247	ENSG00000079785, ENSG00000168883, ENSG00000167088, ENSG00000125743, ENSG00000101161, ENSG00000144028, ENSG00000124193, ENSG00000104897, ENSG00000174243, ENSG00000143977, ENSG00000183431, ENSG00000099995, ENSG00000136450, ENSG00000182004	1935	32	12744	2.8814	0.832106	0.00997475	0.819404
GOTERM_BP_FAT	GO:0043242	negative regulation of protein complex disassembly	201	16	0.700832	0.000623116	ENSG00000100106, ENSG00000115306, ENSG00000042493, ENSG00000137710, ENSG00000050405, ENSG00000198898, ENSG00000131711, ENSG00000077549, ENSG00000087274, ENSG00000148180, ENSG00000047849, ENSG00000197694, ENSG00000116489, ENSG00000126524, ENSG00000166963, ENSG00000070182	1935	41	12744	2.57016	0.919091	0.0139489	1.15269
GOTERM_BP_FAT	GO:0034599	cellular response to oxidative stress	202	16	0.700832	0.000623116	ENSG00000167815, ENSG00000130508, ENSG00000126432, ENSG00000112096, ENSG00000142168, ENSG00000100292, ENSG00000183010, ENSG00000160211, ENSG00000117450, ENSG00000140464, ENSG00000089159, ENSG00000140416, ENSG00000117592, ENSG00000121691, ENSG00000196365, ENSG00000165672	1935	41	12744	2.57016	0.919091	0.0139489	1.15269
GOTERM_BP_FAT	GO:0006405	RNA export from nucleus	203	16	0.700832	0.000623116	ENSG00000135486, ENSG00000132341, ENSG00000119392, ENSG00000184575, ENSG00000183684, ENSG00000198563, ENSG00000005007, ENSG00000114503, ENSG00000157106, ENSG00000181163, ENSG00000030066, ENSG00000132507, ENSG00000162231, ENSG00000111581, ENSG00000069248, ENSG00000136937	1935	41	12744	2.57016	0.919091	0.0139489	1.15269
GOTERM_BP_FAT	GO:0051650	establishment of vesicle localization	204	14	0.613228	0.000629266	ENSG00000095139, ENSG00000181789, ENSG00000107862, ENSG00000122218, ENSG00000111481, ENSG00000105669, ENSG00000099940, ENSG00000092531, ENSG00000170348, ENSG00000129083, ENSG00000106636, ENSG00000162236, ENSG00000169032, ENSG00000184432	1935	33	12744	2.79408	0.921075	0.014008	1.164
GOTERM_BP_FAT	GO:0051648	vesicle localization	205	15	0.65703	0.000635039	ENSG00000095139, ENSG00000181789, ENSG00000107862, ENSG00000122218, ENSG00000111481, ENSG00000105669, ENSG00000099940, ENSG00000092531, ENSG00000184056, ENSG00000170348, ENSG00000129083, ENSG00000106636, ENSG00000162236, ENSG00000169032, ENSG00000184432	1935	37	12744	2.67002	0.922893	0.014058	1.17462
GOTERM_BP_FAT	GO:0046364	monosaccharide biosynthetic process	206	15	0.65703	0.000635039	ENSG00000104522, ENSG00000115159, ENSG00000111669, ENSG00000164708, ENSG00000142657, ENSG00000183048, ENSG00000013375, ENSG00000111674, ENSG00000160211, ENSG00000100889, ENSG00000100504, ENSG00000173599, ENSG00000105220, ENSG00000079739, ENSG00000117143	1935	37	12744	2.67002	0.922893	0.014058	1.17462
GOTERM_BP_FAT	GO:0006839	mitochondrial transport	207	22	0.963644	0.000644008	ENSG00000100075, ENSG00000080824, ENSG00000169100, ENSG00000116688, ENSG00000183048, ENSG00000154174, ENSG00000130204, ENSG00000110711, ENSG00000128654, ENSG00000108179, ENSG00000100216, ENSG00000087088, ENSG00000198954, ENSG00000115840, ENSG00000109519, ENSG00000138297, ENSG00000104980, ENSG00000164924, ENSG00000025772, ENSG00000004864, ENSG00000015475, ENSG00000157184	1935	67	12744	2.16258	0.925635	0.0141775	1.19112
GOTERM_BP_FAT	GO:0007052	mitotic spindle organization	208	9	0.394218	0.00065512	ENSG00000108055, ENSG00000138160, ENSG00000100242, ENSG00000175203, ENSG00000132341, ENSG00000197102, ENSG00000152253, ENSG00000072501, ENSG00000117632	1935	15	12744	3.95163	0.928897	0.0143422	1.21155
GOTERM_BP_FAT	GO:0031529	ruffle organization	209	7	0.306614	0.000672779	ENSG00000068793, ENSG00000132254, ENSG00000198793, ENSG00000140416, ENSG00000050405, ENSG00000165527, ENSG00000136238	1935	9	12744	5.12248	0.933789	0.0146466	1.24402
GOTERM_BP_FAT	GO:0051693	actin filament capping	210	11	0.481822	0.000707561	ENSG00000100106, ENSG00000077549, ENSG00000087274, ENSG00000148180, ENSG00000042493, ENSG00000115306, ENSG00000197694, ENSG00000116489, ENSG00000137710, ENSG00000198898, ENSG00000070182	1935	22	12744	3.29302	0.942462	0.0153156	1.30793
GOTERM_BP_FAT	GO:0009142	nucleoside triphosphate biosynthetic process	211	28	1.22646	0.00080555	ENSG00000028839, ENSG00000167863, ENSG00000159720, ENSG00000081923, ENSG00000152234, ENSG00000147416, ENSG00000116459, ENSG00000149925, ENSG00000047249, ENSG00000017260, ENSG00000058668, ENSG00000110955, ENSG00000171793, ENSG00000004864, ENSG00000128524, ENSG00000114573, ENSG00000167283, ENSG00000174437, ENSG00000131100, ENSG00000165629, ENSG00000011052, ENSG00000110719, ENSG00000071553, ENSG0000…	1935	96	12744	1.92093	0.961261	0.0173261	1.48778
GOTERM_BP_FAT	GO:0006695	cholesterol biosynthetic process	212	12	0.525624	0.000808943	ENSG00000172893, ENSG00000079459, ENSG00000160752, ENSG00000167315, ENSG00000100243, ENSG00000067064, ENSG00000118137, ENSG00000163344, ENSG00000147383, ENSG00000160285, ENSG00000160211, ENSG00000132356	1935	26	12744	3.03971	0.961788	0.0173062	1.494
GOTERM_BP_FAT	GO:0010035	response to inorganic substance	213	49	2.1463	0.000814416	ENSG00000072274, ENSG00000105974, ENSG00000160014, ENSG00000167323, ENSG00000137563, ENSG00000146648, ENSG00000168036, ENSG00000131711, ENSG00000188643, ENSG00000173039, ENSG00000117450, ENSG00000115415, ENSG00000172270, ENSG00000089159, ENSG00000117592, ENSG00000004864, ENSG00000186847, ENSG00000167815, ENSG00000130508, ENSG00000164708, ENSG00000106366, ENSG00000112096, ENSG00000075624, ENSG0000…	1935	202	12744	1.59761	0.962623	0.0173305	1.50404
GOTERM_BP_FAT	GO:0048285	organelle fission	214	53	2.32151	0.000999608	ENSG00000120948, ENSG00000010292, ENSG00000130779, ENSG00000137267, ENSG00000087470, ENSG00000175792, ENSG00000002822, ENSG00000214253, ENSG00000083642, ENSG00000196230, ENSG00000086827, ENSG00000101367, ENSG00000122545, ENSG00000090273, ENSG00000152253, ENSG00000164109, ENSG00000169032, ENSG00000184445, ENSG00000123374, ENSG00000164754, ENSG00000094880, ENSG00000165416, ENSG00000108055, ENSG0000…	1935	225	12744	1.55138	0.982304	0.02112	1.84305
GOTERM_BP_FAT	GO:0016051	carbohydrate biosynthetic process	215	30	1.31406	0.00100908	ENSG00000169764, ENSG00000111669, ENSG00000104522, ENSG00000136542, ENSG00000142657, ENSG00000183048, ENSG00000151348, ENSG00000160211, ENSG00000100889, ENSG00000114480, ENSG00000109814, ENSG00000167123, ENSG00000105220, ENSG00000079739, ENSG00000117143, ENSG00000176022, ENSG00000159921, ENSG00000038274, ENSG00000115159, ENSG00000164708, ENSG00000169105, ENSG00000198380, ENSG00000013375, ENSG0000…	1935	107	12744	1.84656	0.982968	0.021207	1.86035
GOTERM_BP_FAT	GO:0007018	microtubule-based movement	216	30	1.31406	0.00100908	ENSG00000137267, ENSG00000198211, ENSG00000138095, ENSG00000170759, ENSG00000090889, ENSG00000176014, ENSG00000167553, ENSG00000077380, ENSG00000167552, ENSG00000126777, ENSG00000187240, ENSG00000174996, ENSG00000137285, ENSG00000196230, ENSG00000138160, ENSG00000068796, ENSG00000198836, ENSG00000188229, ENSG00000123416, ENSG00000127824, ENSG00000169032, ENSG00000131966, ENSG00000151914, ENSG0000…	1935	107	12744	1.84656	0.982968	0.021207	1.86035
GOTERM_BP_FAT	GO:0006259	DNA metabolic process	217	99	4.3364	0.00108699	ENSG00000108064, ENSG00000176890, ENSG00000196419, ENSG00000071539, ENSG00000005007, ENSG00000167986, ENSG00000183207, ENSG00000065613, ENSG00000131238, ENSG00000140464, ENSG00000159593, ENSG00000123374, ENSG00000108055, ENSG00000099956, ENSG00000168496, ENSG00000175334, ENSG00000087088, ENSG00000106268, ENSG00000159335, ENSG00000112118, ENSG00000147140, ENSG00000163029, ENSG00000107949, ENSG0000…	1935	481	12744	1.35555	0.987566	0.0227084	2.00262
GOTERM_BP_FAT	GO:0032272	negative regulation of protein polymerization	218	12	0.525624	0.00117961	ENSG00000100106, ENSG00000077549, ENSG00000087274, ENSG00000148180, ENSG00000101367, ENSG00000042493, ENSG00000115306, ENSG00000197694, ENSG00000116489, ENSG00000137710, ENSG00000198898, ENSG00000070182	1935	27	12744	2.92713	0.991446	0.0244938	2.1715
GOTERM_BP_FAT	GO:0009116	nucleoside metabolic process	219	20	0.87604	0.00124587	ENSG00000038274, ENSG00000165704, ENSG00000028839, ENSG00000198805, ENSG00000161542, ENSG00000114491, ENSG00000011052, ENSG00000131473, ENSG00000141127, ENSG00000135318, ENSG00000198931, ENSG00000100632, ENSG00000137364, ENSG00000099810, ENSG00000128951, ENSG00000168906, ENSG00000023697, ENSG00000171793, ENSG00000168393, ENSG00000068120	1935	61	12744	2.15936	0.993454	0.0257203	2.29214
GOTERM_BP_FAT	GO:0006518	peptide metabolic process	220	17	0.744634	0.00133279	ENSG00000138413, ENSG00000112096, ENSG00000142168, ENSG00000129128, ENSG00000118363, ENSG00000197448, ENSG00000166340, ENSG00000160211, ENSG00000063854, ENSG00000140612, ENSG00000124767, ENSG00000172009, ENSG00000117298, ENSG00000008394, ENSG00000104324, ENSG00000100983, ENSG00000023909	1935	48	12744	2.33256	0.995392	0.0273512	2.45018
GOTERM_BP_FAT	GO:0046165	alcohol biosynthetic process	221	16	0.700832	0.00144416	ENSG00000111669, ENSG00000104522, ENSG00000115159, ENSG00000164708, ENSG00000142657, ENSG00000183048, ENSG00000013375, ENSG00000111674, ENSG00000160211, ENSG00000100889, ENSG00000100504, ENSG00000173599, ENSG00000105220, ENSG00000120053, ENSG00000079739, ENSG00000117143	1935	44	12744	2.39493	0.997062	0.0294548	2.65234
GOTERM_BP_FAT	GO:0042273	ribosomal large subunit biogenesis	222	7	0.306614	0.00146578	ENSG00000142676, ENSG00000188846, ENSG00000122406, ENSG00000181163, ENSG00000114391, ENSG00000161970, ENSG00000147604	1935	10	12744	4.61023	0.997308	0.0297392	2.69153
GOTERM_BP_FAT	GO:0042274	ribosomal small subunit biogenesis	223	7	0.306614	0.00146578	ENSG00000181163, ENSG00000105372, ENSG00000138326, ENSG00000164587, ENSG00000105193, ENSG00000171863, ENSG00000137154	1935	10	12744	4.61023	0.997308	0.0297392	2.69153
GOTERM_BP_FAT	GO:0060627	regulation of vesicle-mediated transport	224	27	1.18265	0.00154131	ENSG00000169213, ENSG00000105974, ENSG00000179218, ENSG00000100292, ENSG00000107130, ENSG00000103966, ENSG00000130402, ENSG00000092108, ENSG00000116266, ENSG00000111540, ENSG00000131238, ENSG00000042753, ENSG00000136854, ENSG00000135404, ENSG00000127946, ENSG00000145192, ENSG00000165527, ENSG00000176783, ENSG00000108774, ENSG00000073969, ENSG00000086062, ENSG00000071553, ENSG00000138685, ENSG0000…	1935	95	12744	1.87182	0.998016	0.0310924	2.82835
GOTERM_BP_FAT	GO:0006944	membrane fusion	225	18	0.788436	0.00154421	ENSG00000116688, ENSG00000105402, ENSG00000103496, ENSG00000049245, ENSG00000099940, ENSG00000087088, ENSG00000102189, ENSG00000138768, ENSG00000124333, ENSG00000101558, ENSG00000092531, ENSG00000134265, ENSG00000184056, ENSG00000065135, ENSG00000182446, ENSG00000198836, ENSG00000167461, ENSG00000108433	1935	53	12744	2.23677	0.998039	0.030995	2.83359
GOTERM_BP_FAT	GO:0051494	negative regulation of cytoskeleton organization	226	18	0.788436	0.00154421	ENSG00000100106, ENSG00000115306, ENSG00000042493, ENSG00000137710, ENSG00000050405, ENSG00000198898, ENSG00000131711, ENSG00000077549, ENSG00000087274, ENSG00000148180, ENSG00000186635, ENSG00000101367, ENSG00000047849, ENSG00000197694, ENSG00000116489, ENSG00000126524, ENSG00000166963, ENSG00000070182	1935	53	12744	2.23677	0.998039	0.030995	2.83359
GOTERM_BP_FAT	GO:0007017	microtubule-based process	227	55	2.40911	0.00154747	ENSG00000137267, ENSG00000105974, ENSG00000138095, ENSG00000170759, ENSG00000090889, ENSG00000168172, ENSG00000100242, ENSG00000077380, ENSG00000126777, ENSG00000168036, ENSG00000131711, ENSG00000174996, ENSG00000196230, ENSG00000086827, ENSG00000149923, ENSG00000123416, ENSG00000188229, ENSG00000127824, ENSG00000152253, ENSG00000131966, ENSG00000169032, ENSG00000010017, ENSG00000108055, ENSG0000…	1935	240	12744	1.5093	0.998064	0.0309059	2.83949
GOTERM_BP_FAT	GO:0031333	negative regulation of protein complex assembly	228	13	0.569426	0.00167918	ENSG00000100106, ENSG00000115306, ENSG00000042493, ENSG00000070831, ENSG00000198898, ENSG00000137710, ENSG00000077549, ENSG00000148180, ENSG00000087274, ENSG00000101367, ENSG00000197694, ENSG00000116489, ENSG00000070182	1935	32	12744	2.67558	0.998863	0.0333294	3.07762
GOTERM_BP_FAT	GO:0006081	cellular aldehyde metabolic process	229	12	0.525624	0.0016793	ENSG00000143149, ENSG00000177156, ENSG00000072210, ENSG00000111669, ENSG00000138413, ENSG00000184254, ENSG00000053371, ENSG00000164904, ENSG00000124767, ENSG00000182054, ENSG00000117448, ENSG00000137106	1935	28	12744	2.82259	0.998864	0.0331687	3.07783
GOTERM_BP_FAT	GO:0016197	endosome transport	230	19	0.832238	0.00173491	ENSG00000028528, ENSG00000185359, ENSG00000168172, ENSG00000119396, ENSG00000082805, ENSG00000102189, ENSG00000161011, ENSG00000124333, ENSG00000110047, ENSG00000069329, ENSG00000122958, ENSG00000086065, ENSG00000003056, ENSG00000111737, ENSG00000196961, ENSG00000106636, ENSG00000162236, ENSG00000196924, ENSG00000177951	1935	58	12744	2.1575	0.999092	0.0340824	3.17821
GOTERM_BP_FAT	GO:0015986	ATP synthesis coupled proton transport	231	14	0.613228	0.00216703	ENSG00000167283, ENSG00000131100, ENSG00000167863, ENSG00000165629, ENSG00000159720, ENSG00000110719, ENSG00000071553, ENSG00000147416, ENSG00000116459, ENSG00000152234, ENSG00000047249, ENSG00000110955, ENSG00000128524, ENSG00000114573	1935	37	12744	2.49202	0.999842	0.0421938	3.95481
GOTERM_BP_FAT	GO:0015985	energy coupled proton transport, down electrochemical gradient	232	14	0.613228	0.00216703	ENSG00000167283, ENSG00000131100, ENSG00000167863, ENSG00000165629, ENSG00000159720, ENSG00000110719, ENSG00000071553, ENSG00000147416, ENSG00000116459, ENSG00000152234, ENSG00000047249, ENSG00000110955, ENSG00000128524, ENSG00000114573	1935	37	12744	2.49202	0.999842	0.0421938	3.95481
GOTERM_BP_FAT	GO:0006268	DNA unwinding during replication	233	8	0.350416	0.00235139	ENSG00000073111, ENSG00000185129, ENSG00000189403, ENSG00000076003, ENSG00000164104, ENSG00000104738, ENSG00000198900, ENSG00000166508	1935	14	12744	3.76346	0.999925	0.0454854	4.28435
GOTERM_BP_FAT	GO:0009201	ribonucleoside triphosphate biosynthetic process	234	26	1.13885	0.00245764	ENSG00000167863, ENSG00000159720, ENSG00000081923, ENSG00000152234, ENSG00000147416, ENSG00000116459, ENSG00000149925, ENSG00000047249, ENSG00000017260, ENSG00000058668, ENSG00000110955, ENSG00000171793, ENSG00000004864, ENSG00000128524, ENSG00000114573, ENSG00000167283, ENSG00000174437, ENSG00000131100, ENSG00000165629, ENSG00000011052, ENSG00000110719, ENSG00000071553, ENSG00000147853, ENSG0000…	1935	93	12744	1.84126	0.999951	0.0472675	4.47378
GOTERM_BP_FAT	GO:0006754	ATP biosynthetic process	235	24	1.05125	0.00278191	ENSG00000167283, ENSG00000174437, ENSG00000131100, ENSG00000167863, ENSG00000165629, ENSG00000159720, ENSG00000071553, ENSG00000110719, ENSG00000081923, ENSG00000152234, ENSG00000147416, ENSG00000116459, ENSG00000149925, ENSG00000147853, ENSG00000047249, ENSG00000017260, ENSG00000058668, ENSG00000105726, ENSG00000110955, ENSG00000004864, ENSG00000128524, ENSG00000070961, ENSG00000163399, ENSG0000…	1935	84	12744	1.88173	0.999987	0.0530914	5.04972
GOTERM_BP_FAT	GO:0032392	DNA geometric change	236	9	0.394218	0.00291113	ENSG00000073111, ENSG00000185129, ENSG00000189403, ENSG00000076003, ENSG00000164104, ENSG00000104738, ENSG00000156502, ENSG00000198900, ENSG00000166508	1935	18	12744	3.29302	0.999992	0.0552308	5.27831
GOTERM_BP_FAT	GO:0006541	glutamine metabolic process	237	9	0.394218	0.00291113	ENSG00000163655, ENSG00000178921, ENSG00000084774, ENSG00000137563, ENSG00000198380, ENSG00000092621, ENSG00000171793, ENSG00000115419, ENSG00000070669	1935	18	12744	3.29302	0.999992	0.0552308	5.27831
GOTERM_BP_FAT	GO:0032508	DNA duplex unwinding	238	9	0.394218	0.00291113	ENSG00000073111, ENSG00000185129, ENSG00000189403, ENSG00000076003, ENSG00000164104, ENSG00000104738, ENSG00000156502, ENSG00000198900, ENSG00000166508	1935	18	12744	3.29302	0.999992	0.0552308	5.27831
GOTERM_BP_FAT	GO:0010605	negative regulation of macromolecule metabolic process	239	137	6.00088	0.0029566	ENSG00000105974, ENSG00000138448, ENSG00000144744, ENSG00000161057, ENSG00000205220, ENSG00000100764, ENSG00000159692, ENSG00000204264, ENSG00000136770, ENSG00000173039, ENSG00000108953, ENSG00000168610, ENSG00000140464, ENSG00000130726, ENSG00000175550, ENSG00000088832, ENSG00000134046, ENSG00000103035, ENSG00000124831, ENSG00000126067, ENSG00000196591, ENSG00000128708, ENSG00000087087, ENSG0000…	1935	719	12744	1.25492	0.999994	0.0558081	5.35862
GOTERM_BP_FAT	GO:0050690	regulation of defense response to virus by virus	240	6	0.262812	0.00299958	ENSG00000042753, ENSG00000047249, ENSG00000196961, ENSG00000183020, ENSG00000161203, ENSG00000006125	1935	8	12744	4.93953	0.999995	0.0563343	5.43449
GOTERM_BP_FAT	GO:0009263	deoxyribonucleotide biosynthetic process	241	6	0.262812	0.00299958	ENSG00000028839, ENSG00000154027, ENSG00000167325, ENSG00000176890, ENSG00000171848, ENSG00000168393	1935	8	12744	4.93953	0.999995	0.0563343	5.43449
GOTERM_BP_FAT	GO:0030048	actin filament-based movement	242	10	0.43802	0.00318775	ENSG00000158195, ENSG00000159251, ENSG00000099331, ENSG00000157483, ENSG00000140416, ENSG00000196586, ENSG00000100345, ENSG00000133026, ENSG00000092841, ENSG00000105357	1935	22	12744	2.99366	0.999997	0.0594899	5.76591
GOTERM_BP_FAT	GO:0010639	negative regulation of organelle organization	243	23	1.00745	0.00320719	ENSG00000100106, ENSG00000042493, ENSG00000115306, ENSG00000137710, ENSG00000050405, ENSG00000198898, ENSG00000047410, ENSG00000131711, ENSG00000077549, ENSG00000087274, ENSG00000148180, ENSG00000181163, ENSG00000130816, ENSG00000186635, ENSG00000101367, ENSG00000047849, ENSG00000197694, ENSG00000119335, ENSG00000116489, ENSG00000126524, ENSG00000166963, ENSG00000164109, ENSG00000070182	1935	80	12744	1.89349	0.999998	0.0595672	5.80008
GOTERM_BP_FAT	GO:0030837	negative regulation of actin filament polymerization	244	11	0.481822	0.00325914	ENSG00000100106, ENSG00000077549, ENSG00000087274, ENSG00000148180, ENSG00000042493, ENSG00000115306, ENSG00000197694, ENSG00000116489, ENSG00000137710, ENSG00000198898, ENSG00000070182	1935	26	12744	2.7864	0.999998	0.0602272	5.89136
GOTERM_BP_FAT	GO:0009262	deoxyribonucleotide metabolic process	245	11	0.481822	0.00325914	ENSG00000028839, ENSG00000103152, ENSG00000154027, ENSG00000167325, ENSG00000112667, ENSG00000176890, ENSG00000128951, ENSG00000106268, ENSG00000171848, ENSG00000023697, ENSG00000168393	1935	26	12744	2.7864	0.999998	0.0602272	5.89136
GOTERM_BP_FAT	GO:0048278	vesicle docking	246	11	0.481822	0.00325914	ENSG00000092108, ENSG00000116266, ENSG00000184056, ENSG00000103496, ENSG00000131558, ENSG00000049245, ENSG00000070367, ENSG00000136854, ENSG00000106636, ENSG00000136631, ENSG00000167461	1935	26	12744	2.7864	0.999998	0.0602272	5.89136
GOTERM_BP_FAT	GO:0043489	RNA stabilization	247	8	0.350416	0.00383563	ENSG00000066044, ENSG00000153187, ENSG00000135829, ENSG00000172239, ENSG00000138668, ENSG00000070756, ENSG00000065978, ENSG00000135316	1935	15	12744	3.51256	1	0.0701969	6.89864
GOTERM_BP_FAT	GO:0048255	mRNA stabilization	248	8	0.350416	0.00383563	ENSG00000066044, ENSG00000153187, ENSG00000135829, ENSG00000172239, ENSG00000138668, ENSG00000070756, ENSG00000065978, ENSG00000135316	1935	15	12744	3.51256	1	0.0701969	6.89864
GOTERM_BP_FAT	GO:0016126	sterol biosynthetic process	249	13	0.569426	0.0040014	ENSG00000100243, ENSG00000067064, ENSG00000118137, ENSG00000163344, ENSG00000147383, ENSG00000160211, ENSG00000079459, ENSG00000172893, ENSG00000159348, ENSG00000160752, ENSG00000167315, ENSG00000132356, ENSG00000160285	1935	35	12744	2.44625	1	0.072794	7.1864
GOTERM_BP_FAT	GO:0022411	cellular component disassembly	250	17	0.744634	0.00416501	ENSG00000073584, ENSG00000160049, ENSG00000142168, ENSG00000106991, ENSG00000172115, ENSG00000087088, ENSG00000177469, ENSG00000142945, ENSG00000117632, ENSG00000135862, ENSG00000120705, ENSG00000007168, ENSG00000131238, ENSG00000156709, ENSG00000119335, ENSG00000148187, ENSG00000088930	1935	53	12744	2.11251	1	0.0753227	7.46958
GOTERM_BP_FAT	GO:0007015	actin filament organization	251	21	0.919842	0.00426063	ENSG00000092820, ENSG00000106299, ENSG00000122786, ENSG00000159251, ENSG00000050405, ENSG00000113758, ENSG00000102024, ENSG00000130402, ENSG00000131504, ENSG00000087274, ENSG00000148180, ENSG00000125868, ENSG00000186635, ENSG00000149925, ENSG00000172757, ENSG00000180370, ENSG00000075618, ENSG00000072110, ENSG00000196924, ENSG00000136238, ENSG00000067560	1935	72	12744	1.92093	1	0.0766447	7.63469
GOTERM_BP_FAT	GO:0006890	retrograde vesicle-mediated transport, Golgi to ER	252	9	0.394218	0.0043666	ENSG00000095139, ENSG00000092108, ENSG00000181789, ENSG00000107862, ENSG00000129083, ENSG00000122218, ENSG00000111481, ENSG00000105669, ENSG00000184432	1935	19	12744	3.11971	1	0.0781311	7.81737
GOTERM_BP_FAT	GO:0009126	purine nucleoside monophosphate metabolic process	253	9	0.394218	0.0043666	ENSG00000163655, ENSG00000178921, ENSG00000178035, ENSG00000147853, ENSG00000128050, ENSG00000138363, ENSG00000035687, ENSG00000159131, ENSG00000135318	1935	19	12744	3.11971	1	0.0781311	7.81737
GOTERM_BP_FAT	GO:0009167	purine ribonucleoside monophosphate metabolic process	254	9	0.394218	0.0043666	ENSG00000163655, ENSG00000178921, ENSG00000178035, ENSG00000147853, ENSG00000128050, ENSG00000138363, ENSG00000035687, ENSG00000159131, ENSG00000135318	1935	19	12744	3.11971	1	0.0781311	7.81737
GOTERM_BP_FAT	GO:0009206	purine ribonucleoside triphosphate biosynthetic process	255	25	1.09505	0.00451142	ENSG00000167863, ENSG00000159720, ENSG00000081923, ENSG00000152234, ENSG00000147416, ENSG00000116459, ENSG00000149925, ENSG00000047249, ENSG00000017260, ENSG00000058668, ENSG00000110955, ENSG00000004864, ENSG00000128524, ENSG00000114573, ENSG00000167283, ENSG00000174437, ENSG00000131100, ENSG00000165629, ENSG00000011052, ENSG00000071553, ENSG00000110719, ENSG00000147853, ENSG00000105726, ENSG0000…	1935	92	12744	1.78969	1	0.0802661	8.06645
GOTERM_BP_FAT	GO:0042254	ribosome biogenesis	256	30	1.31406	0.00491008	ENSG00000055044, ENSG00000053372, ENSG00000105193, ENSG00000148303, ENSG00000138326, ENSG00000171863, ENSG00000101361, ENSG00000077348, ENSG00000119285, ENSG00000111641, ENSG00000181163, ENSG00000130713, ENSG00000083520, ENSG00000089157, ENSG00000141543, ENSG00000100138, ENSG00000188846, ENSG00000122406, ENSG00000114391, ENSG00000178896, ENSG00000147604, ENSG00000144895, ENSG00000142676, ENSG0000…	1935	118	12744	1.67442	1	0.0866781	8.74884
GOTERM_BP_FAT	GO:0000087	M phase of mitotic cell cycle	257	49	2.1463	0.00513967	ENSG00000120948, ENSG00000010292, ENSG00000137267, ENSG00000130779, ENSG00000175792, ENSG00000002822, ENSG00000196230, ENSG00000083642, ENSG00000101367, ENSG00000086827, ENSG00000122545, ENSG00000090273, ENSG00000152253, ENSG00000164109, ENSG00000169032, ENSG00000184445, ENSG00000123374, ENSG00000164754, ENSG00000094880, ENSG00000114391, ENSG00000165416, ENSG00000108055, ENSG00000113810, ENSG0000…	1935	220	12744	1.46689	1	0.0901594	9.13965
GOTERM_BP_FAT	GO:0009145	purine nucleoside triphosphate biosynthetic process	258	25	1.09505	0.00522578	ENSG00000167863, ENSG00000159720, ENSG00000081923, ENSG00000152234, ENSG00000147416, ENSG00000116459, ENSG00000149925, ENSG00000047249, ENSG00000017260, ENSG00000058668, ENSG00000110955, ENSG00000004864, ENSG00000128524, ENSG00000114573, ENSG00000167283, ENSG00000174437, ENSG00000131100, ENSG00000165629, ENSG00000011052, ENSG00000071553, ENSG00000110719, ENSG00000147853, ENSG00000105726, ENSG0000…	1935	93	12744	1.77044	1	0.0912073	9.28582
GOTERM_BP_FAT	GO:0051259	protein oligomerization	259	40	1.75208	0.00564448	ENSG00000105974, ENSG00000167325, ENSG00000184640, ENSG00000166333, ENSG00000173801, ENSG00000177885, ENSG00000184743, ENSG00000138758, ENSG00000168036, ENSG00000067057, ENSG00000116266, ENSG00000166913, ENSG00000181163, ENSG00000096433, ENSG00000008294, ENSG00000077522, ENSG00000148175, ENSG00000122545, ENSG00000104325, ENSG00000112304, ENSG00000169032, ENSG00000152556, ENSG00000011485, ENSG0000…	1935	172	12744	1.53164	1	0.0977443	9.99339
GOTERM_BP_FAT	GO:0007006	mitochondrial membrane organization	260	12	0.525624	0.00564515	ENSG00000080824, ENSG00000116688, ENSG00000097033, ENSG00000087470, ENSG00000198836, ENSG00000168924, ENSG00000108179, ENSG00000170606, ENSG00000100216, ENSG00000087088, ENSG00000105197, ENSG00000015475	1935	32	12744	2.46977	1	0.0973392	9.99453
GOTERM_BP_FAT	GO:0070647	protein modification by small protein conjugation or removal	261	37	1.62067	0.00568954	ENSG00000177889, ENSG00000124486, ENSG00000144744, ENSG00000124208, ENSG00000103342, ENSG00000128731, ENSG00000086758, ENSG00000153827, ENSG00000186591, ENSG00000167986, ENSG00000105393, ENSG00000142230, ENSG00000103266, ENSG00000159593, ENSG00000121022, ENSG00000150991, ENSG00000185651, ENSG00000155827, ENSG00000114062, ENSG00000092148, ENSG00000111530, ENSG00000081154, ENSG00000110107, ENSG0000…	1935	156	12744	1.56208	1	0.097652	10.0692
GOTERM_BP_FAT	GO:0008629	induction of apoptosis by intracellular signals	262	16	0.700832	0.00580701	ENSG00000116062, ENSG00000139842, ENSG00000100292, ENSG00000036257, ENSG00000175467, ENSG00000166266, ENSG00000175793, ENSG00000184047, ENSG00000087088, ENSG00000163565, ENSG00000137831, ENSG00000156709, ENSG00000108094, ENSG00000055130, ENSG00000140464, ENSG00000154229	1935	50	12744	2.10753	1	0.0991502	10.2667
GOTERM_BP_FAT	GO:0006997	nucleus organization	263	16	0.700832	0.00580701	ENSG00000084073, ENSG00000160049, ENSG00000100242, ENSG00000131018, ENSG00000142168, ENSG00000172115, ENSG00000110713, ENSG00000087088, ENSG00000160789, ENSG00000007168, ENSG00000131238, ENSG00000156709, ENSG00000140464, ENSG00000137497, ENSG00000102119, ENSG00000069248	1935	50	12744	2.10753	1	0.0991502	10.2667
GOTERM_BP_FAT	GO:0007067	mitosis	264	48	2.1025	0.00588427	ENSG00000010292, ENSG00000124486, ENSG00000120948, ENSG00000130779, ENSG00000137267, ENSG00000198211, ENSG00000154473, ENSG00000168385, ENSG00000132341, ENSG00000175792, ENSG00000002822, ENSG00000072501, ENSG00000170312, ENSG00000204843, ENSG00000137285, ENSG00000083642, ENSG00000196230, ENSG00000086827, ENSG00000138160, ENSG00000101367, ENSG00000175203, ENSG00000122545, ENSG00000090273, ENSG0000…	1935	216	12744	1.46357	1	0.0999832	10.3963
GOTERM_BP_FAT	GO:0000280	nuclear division	265	48	2.1025	0.00588427	ENSG00000010292, ENSG00000124486, ENSG00000120948, ENSG00000130779, ENSG00000137267, ENSG00000198211, ENSG00000154473, ENSG00000168385, ENSG00000132341, ENSG00000175792, ENSG00000002822, ENSG00000072501, ENSG00000170312, ENSG00000204843, ENSG00000137285, ENSG00000083642, ENSG00000196230, ENSG00000086827, ENSG00000138160, ENSG00000101367, ENSG00000175203, ENSG00000122545, ENSG00000090273, ENSG0000…	1935	216	12744	1.46357	1	0.0999832	10.3963
GOTERM_BP_FAT	GO:0045047	protein targeting to ER	266	6	0.262812	0.00590809	ENSG00000100883, ENSG00000174780, ENSG00000140319, ENSG00000127603, ENSG00000153037, ENSG00000182934	1935	9	12744	4.3907	1	0.0999488	10.4362
GOTERM_BP_FAT	GO:0018196	peptidyl-asparagine modification	267	6	0.262812	0.00590809	ENSG00000118705, ENSG00000134910, ENSG00000104723, ENSG00000163902, ENSG00000102158, ENSG00000163527	1935	9	12744	4.3907	1	0.0999488	10.4362
GOTERM_BP_FAT	GO:0018279	protein amino acid N-linked glycosylation via asparagine	268	6	0.262812	0.00590809	ENSG00000118705, ENSG00000134910, ENSG00000104723, ENSG00000163902, ENSG00000102158, ENSG00000163527	1935	9	12744	4.3907	1	0.0999488	10.4362
GOTERM_BP_FAT	GO:0006458	'de novo' protein folding	269	8	0.350416	0.00593487	ENSG00000109971, ENSG00000132002, ENSG00000136827, ENSG00000097033, ENSG00000197930, ENSG00000144381, ENSG00000088832, ENSG00000136731	1935	16	12744	3.29302	1	0.099962	10.481
GOTERM_BP_FAT	GO:0030199	collagen fibril organization	270	11	0.481822	0.00603965	ENSG00000149257, ENSG00000168542, ENSG00000113083, ENSG00000182718, ENSG00000130635, ENSG00000204262, ENSG00000122884, ENSG00000111799, ENSG00000164692, ENSG00000196712, ENSG00000108821	1935	28	12744	2.58738	1	0.101219	10.6564
GOTERM_BP_FAT	GO:0010970	microtubule-based transport	271	11	0.481822	0.00603965	ENSG00000140983, ENSG00000174996, ENSG00000007168, ENSG00000138095, ENSG00000170759, ENSG00000090889, ENSG00000126214, ENSG00000198836, ENSG00000151914, ENSG00000127603, ENSG00000169032	1935	28	12744	2.58738	1	0.101219	10.6564
GOTERM_BP_FAT	GO:0006614	SRP-dependent cotranslational protein targeting to membrane	272	5	0.21901	0.00613307	ENSG00000100883, ENSG00000174780, ENSG00000140319, ENSG00000153037, ENSG00000182934	1935	6	12744	5.48837	1	0.102282	10.8125
GOTERM_BP_FAT	GO:0033540	fatty acid beta-oxidation using acyl-CoA oxidase	273	5	0.21901	0.00613307	ENSG00000060971, ENSG00000095321, ENSG00000101986, ENSG00000133835, ENSG00000161533	1935	6	12744	5.48837	1	0.102282	10.8125
GOTERM_BP_FAT	GO:0006904	vesicle docking during exocytosis	274	10	0.43802	0.00630176	ENSG00000092108, ENSG00000116266, ENSG00000184056, ENSG00000103496, ENSG00000131558, ENSG00000049245, ENSG00000136854, ENSG00000106636, ENSG00000136631, ENSG00000167461	1935	24	12744	2.74419	1	0.104522	11.0936
GOTERM_BP_FAT	GO:0009161	ribonucleoside monophosphate metabolic process	275	10	0.43802	0.00630176	ENSG00000163655, ENSG00000178921, ENSG00000178035, ENSG00000147853, ENSG00000128050, ENSG00000138363, ENSG00000114491, ENSG00000035687, ENSG00000159131, ENSG00000135318	1935	24	12744	2.74419	1	0.104522	11.0936
GOTERM_BP_FAT	GO:0030433	ER-associated protein catabolic process	276	10	0.43802	0.00630176	ENSG00000147475, ENSG00000165280, ENSG00000136813, ENSG00000166598, ENSG00000182446, ENSG00000107566, ENSG00000143947, ENSG00000150991, ENSG00000136986, ENSG00000170315	1935	24	12744	2.74419	1	0.104522	11.0936
GOTERM_BP_FAT	GO:0030100	regulation of endocytosis	277	18	0.788436	0.0065086	ENSG00000176783, ENSG00000105974, ENSG00000108774, ENSG00000179218, ENSG00000103966, ENSG00000130402, ENSG00000071553, ENSG00000111540, ENSG00000131238, ENSG00000042753, ENSG00000135404, ENSG00000100266, ENSG00000127946, ENSG00000154229, ENSG00000164171, ENSG00000145192, ENSG00000165527, ENSG00000136238	1935	60	12744	1.97581	1	0.107332	11.4372
GOTERM_BP_FAT	GO:0044270	nitrogen compound catabolic process	278	19	0.832238	0.00673497	ENSG00000106605, ENSG00000198805, ENSG00000165609, ENSG00000112667, ENSG00000100292, ENSG00000099331, ENSG00000131473, ENSG00000135318, ENSG00000152234, ENSG00000103152, ENSG00000173786, ENSG00000136010, ENSG00000103415, ENSG00000106268, ENSG00000128309, ENSG00000138430, ENSG00000110955, ENSG00000023697, ENSG00000196365	1935	65	12744	1.92515	1	0.110414	11.8118
GOTERM_BP_FAT	GO:0033554	cellular response to stress	279	105	4.59921	0.00680476	ENSG00000105974, ENSG00000176890, ENSG00000196419, ENSG00000071539, ENSG00000005007, ENSG00000172037, ENSG00000167986, ENSG00000117450, ENSG00000183207, ENSG00000065613, ENSG00000140464, ENSG00000159593, ENSG00000089159, ENSG00000117592, ENSG00000167815, ENSG00000108055, ENSG00000196591, ENSG00000168496, ENSG00000136986, ENSG00000087088, ENSG00000135842, ENSG00000115211, ENSG00000070669, ENSG0000…	1935	545	12744	1.26887	1	0.111046	11.927
GOTERM_BP_FAT	GO:0006508	proteolysis	280	180	7.88436	0.0070833	ENSG00000010256, ENSG00000084073, ENSG00000144744, ENSG00000161057, ENSG00000205220, ENSG00000125746, ENSG00000070010, ENSG00000100764, ENSG00000153827, ENSG00000118363, ENSG00000166233, ENSG00000204264, ENSG00000167986, ENSG00000113441, ENSG00000173039, ENSG00000142230, ENSG00000126261, ENSG00000159593, ENSG00000154582, ENSG00000141279, ENSG00000167770, ENSG00000078140, ENSG00000114786, ENSG0000…	1935	997	12744	1.18906	1	0.114873	12.3853
GOTERM_BP_FAT	GO:0006626	protein targeting to mitochondrion	281	12	0.525624	0.00732817	ENSG00000116688, ENSG00000154174, ENSG00000109519, ENSG00000130204, ENSG00000138297, ENSG00000110711, ENSG00000128654, ENSG00000104980, ENSG00000100216, ENSG00000164924, ENSG00000025772, ENSG00000015475	1935	33	12744	2.39493	1	0.118141	12.7863
GOTERM_BP_FAT	GO:0070585	protein localization in mitochondrion	282	12	0.525624	0.00732817	ENSG00000116688, ENSG00000154174, ENSG00000109519, ENSG00000130204, ENSG00000138297, ENSG00000110711, ENSG00000128654, ENSG00000104980, ENSG00000100216, ENSG00000164924, ENSG00000025772, ENSG00000015475	1935	33	12744	2.39493	1	0.118141	12.7863
GOTERM_BP_FAT	GO:0070507	regulation of microtubule cytoskeleton organization	283	14	0.613228	0.00745425	ENSG00000105974, ENSG00000151914, ENSG00000131711, ENSG00000127603, ENSG00000168036, ENSG00000181163, ENSG00000134318, ENSG00000101367, ENSG00000099901, ENSG00000047849, ENSG00000144635, ENSG00000082898, ENSG00000126524, ENSG00000166963	1935	42	12744	2.19535	1	0.119579	12.9921
GOTERM_BP_FAT	GO:0030198	extracellular matrix organization	284	26	1.13885	0.00781996	ENSG00000127616, ENSG00000142173, ENSG00000130635, ENSG00000122884, ENSG00000204262, ENSG00000091986, ENSG00000149084, ENSG00000166333, ENSG00000113083, ENSG00000131981, ENSG00000088832, ENSG00000164692, ENSG00000133392, ENSG00000149257, ENSG00000168542, ENSG00000182718, ENSG00000106991, ENSG00000142798, ENSG00000111799, ENSG00000196712, ENSG00000108821, ENSG00000135862, ENSG00000086062, ENSG0000…	1935	101	12744	1.69542	1	0.124593	13.5865
GOTERM_BP_FAT	GO:0010033	response to organic substance	285	131	5.73806	0.00788405	ENSG00000109971, ENSG00000072274, ENSG00000010256, ENSG00000105974, ENSG00000144224, ENSG00000173039, ENSG00000115415, ENSG00000121769, ENSG00000168610, ENSG00000140464, ENSG00000172757, ENSG00000198793, ENSG00000126803, ENSG00000088832, ENSG00000145050, ENSG00000167815, ENSG00000165704, ENSG00000164070, ENSG00000145675, ENSG00000196591, ENSG00000132142, ENSG00000087087, ENSG00000157227, ENSG0000…	1935	703	12744	1.22727	1	0.12506	13.6903
GOTERM_BP_FAT	GO:0034614	cellular response to reactive oxygen species	286	11	0.481822	0.00798734	ENSG00000167815, ENSG00000117450, ENSG00000130508, ENSG00000126432, ENSG00000112096, ENSG00000142168, ENSG00000089159, ENSG00000140416, ENSG00000117592, ENSG00000121691, ENSG00000165672	1935	29	12744	2.49816	1	0.126103	13.8573
GOTERM_BP_FAT	GO:0006749	glutathione metabolic process	287	10	0.43802	0.00854333	ENSG00000063854, ENSG00000138413, ENSG00000112096, ENSG00000142168, ENSG00000124767, ENSG00000008394, ENSG00000197448, ENSG00000160211, ENSG00000100983, ENSG00000023909	1935	25	12744	2.63442	1	0.133781	14.7509
GOTERM_BP_FAT	GO:0032446	protein modification by small protein conjugation	288	31	1.35786	0.00873268	ENSG00000177889, ENSG00000144744, ENSG00000124208, ENSG00000103342, ENSG00000128731, ENSG00000086758, ENSG00000153827, ENSG00000186591, ENSG00000167986, ENSG00000142230, ENSG00000103266, ENSG00000159593, ENSG00000150991, ENSG00000185651, ENSG00000155827, ENSG00000114062, ENSG00000092148, ENSG00000081154, ENSG00000111530, ENSG00000110107, ENSG00000170315, ENSG00000165280, ENSG00000136153, ENSG0000…	1935	128	12744	1.59506	1	0.136022	15.0532
GOTERM_BP_FAT	GO:0006297	nucleotide-excision repair, DNA gap filling	289	8	0.350416	0.00878513	ENSG00000133119, ENSG00000163918, ENSG00000062822, ENSG00000106628, ENSG00000111445, ENSG00000132646, ENSG00000049541, ENSG00000132383	1935	17	12744	3.09932	1	0.136261	15.1368
GOTERM_BP_FAT	GO:0006221	pyrimidine nucleotide biosynthetic process	290	9	0.394218	0.00887564	ENSG00000162368, ENSG00000028839, ENSG00000154027, ENSG00000176890, ENSG00000084774, ENSG00000114491, ENSG00000011052, ENSG00000168393, ENSG00000171793	1935	21	12744	2.82259	1	0.137046	15.2808
GOTERM_BP_FAT	GO:0006261	DNA-dependent DNA replication	291	17	0.744634	0.00897754	ENSG00000073111, ENSG00000189403, ENSG00000108064, ENSG00000062822, ENSG00000106628, ENSG00000168496, ENSG00000133119, ENSG00000185129, ENSG00000163918, ENSG00000100297, ENSG00000076003, ENSG00000164104, ENSG00000112118, ENSG00000104738, ENSG00000198900, ENSG00000166508, ENSG00000132383	1935	57	12744	1.96426	1	0.137988	15.4426
GOTERM_BP_FAT	GO:0009309	amine biosynthetic process	292	21	0.919842	0.00949551	ENSG00000143811, ENSG00000160200, ENSG00000038274, ENSG00000059573, ENSG00000146733, ENSG00000104524, ENSG00000125166, ENSG00000159423, ENSG00000130707, ENSG00000100714, ENSG00000092621, ENSG00000083444, ENSG00000183010, ENSG00000148672, ENSG00000070669, ENSG00000145293, ENSG00000102172, ENSG00000135069, ENSG00000116649, ENSG00000168906, ENSG00000120053	1935	77	12744	1.79619	1	0.14483	16.2609
GOTERM_BP_FAT	GO:0006260	DNA replication	293	41	1.79588	0.00968576	ENSG00000073111, ENSG00000149115, ENSG00000167325, ENSG00000108064, ENSG00000176890, ENSG00000187109, ENSG00000049541, ENSG00000110713, ENSG00000005007, ENSG00000128951, ENSG00000100297, ENSG00000020922, ENSG00000119335, ENSG00000159593, ENSG00000164104, ENSG00000111445, ENSG00000132646, ENSG00000104738, ENSG00000166508, ENSG00000132383, ENSG00000123374, ENSG00000106028, ENSG00000189403, ENSG0000…	1935	183	12744	1.47556	1	0.146968	16.5596
GOTERM_BP_FAT	GO:0051651	maintenance of location in cell	294	15	0.65703	0.00988109	ENSG00000092820, ENSG00000167996, ENSG00000105974, ENSG00000138757, ENSG00000163631, ENSG00000185104, ENSG00000171298, ENSG00000166913, ENSG00000136068, ENSG00000140464, ENSG00000167004, ENSG00000196924, ENSG00000075142, ENSG00000171914, ENSG00000137076	1935	48	12744	2.05814	1	0.149156	16.8652
